# 1 Developmentally arrested 2 precursors of pontine neurons 3 establish an embryonic blueprint of 4 the *Drosophila* central complex

5 Ingrid V. Andrade<sup>1</sup>, Nadia Riebli<sup>2</sup>, Bao-Chau M. Nguyen<sup>1</sup>, Jaison J. Omoto<sup>1</sup>, Richard  
6 D. Fetter<sup>3</sup>, Albert Cardona<sup>3</sup>, Volker Hartenstein<sup>1\*</sup>

\*For correspondence:

[volkerh@mcdb.ucla.edu](mailto:volkerh@mcdb.ucla.edu) (VH)

7 Present address: Department of  
8 Molecular, Cell, and Developmental  
9 Biology, University of California Los  
10 Angeles, 610 Charles E. Young  
11 Drive, 5014 Terasaki Life Sciences  
12 Bldg, Los Angeles, CA 90095-1606

1 Department of Molecular Cell and Developmental Biology, University of California Los Angeles, Los Angeles, CA 90095, USA; <sup>2</sup>Biozentrum, University of Basel, Klingelbergstrasse 50, Basel, Switzerland; <sup>3</sup>Janelia Research Campus, Howard Hughes Medical Institute, Ashburn, United States

---

12 **Abstract** Serial electron microscopic analysis shows that the *Drosophila* brain at hatching  
13 possesses a large fraction of developmentally arrested neurons with a small soma,  
14 heterochromatin-rich nucleus, and unbranched axon lacking synapses. We digitally reconstructed  
15 all 812 “small undifferentiated” (SU) neurons on both hemispheres and assigned them to the  
16 known brain lineages. 54 SU neurons belonging to the DM1-4 lineages, which generate all  
17 columnar neurons of the central complex, form an embryonic nucleus of the fan-shaped body (FB).  
18 These “FB pioneers” develop into a specific class of bi-columnar elements, the pontine neurons.  
19 Even though later born, unicolumnar DM1-4 neurons fasciculate with the FB pioneers, selective  
20 ablation of these cells did not result in gross abnormalities of the trajectories of unicolumnar  
21 neurons, indicating that axonal pathfinding of the two systems is controlled independently. Our  
22 comprehensive spatial and developmental analysis of the SU neuron adds to our understanding of  
23 the establishment of neuronal circuitry.

---

## 25 Introduction

26 The central complex (CX) of the insect brain plays an important role in a variety of different behaviors,  
27 including the fine control of motor movement and spatial orientation (Martin et al., 1999; Neuser et  
28 al., 2008; Bender et al., 2010; Kahsai et al., 2010; Ofstad et al. 2011; Pfeiffer et al., 2014). Recent  
29 studies indicate that the CX harbors dynamic neural activity that integrates the animal's external  
30 and internal environment (Seelig and Jayaraman, 2015; Green et al., 2017; Turner-Evans et al., 2017).  
31 Anatomical studies have started to reveal the neuronal connectivity that underlies CX function. The  
32 CX is comprised of four major compartments, including (from anterior to posterior) the ellipsoid  
33 body (EB), fan-shaped body (FB) with noduli (NO), and protocerebral bridge (PB; Strausfeld, 1976;  
34 Hanesch et al., 1989; Fig.1). CX circuitry is dominated by an orthogonal scaffold of transversally  
35 oriented (“tangential”) widefield neurons, and longitudinally oriented columnar small field neurons.  
36 Tangential neurons, whose fibres are directed parallel to the length axis of the CX neuropils (a, b,  
37 c in Fig.1), provide input to the CX from other brain areas. Best understood among these input  
38 neurons are the TL-neurons in locust (el Jundi et al., 2014) and their *Drosophila* counterparts, the  
39 R-neurons, that conduct retinotopically ordered visual information to the ellipsoid body (Seelig and

40 Jayaraman, 2013; Fig.1). Columnar neurons, which interconnect the different CX neuropils along the  
41 antero-posterior axis, are characterized by highly localized dendritic and axonal endings in narrow  
42 volumes (“columns”) of the respective compartments. Most classes of columnar neurons, within  
43 a given CX neuropil, are confined to a single column (“unicolumnar neurons”; Fig.1). Projections  
44 are characterized by a strict homotopic order, whereby columns within the lateral half of the PB  
45 are connected to columns of the ipsilateral PB and EB, and medial PB columns project to the  
46 contralateral FB and EB (Fig.1). One class of columnar neurons, the so-called pontine neurons of  
47 the fan-shaped body (Hanesch et al., 1989; Young and Armstrong, 2010), behave differently. Their  
48 projection is restricted to the FB, interconnecting two FB columns located on either side of the  
49 midline (“bicolumnar neurons”; Fig.1).

50 Developmental studies provide a valuable approach to unravel the circuitry of the brain, including  
51 the central complex. A hallmark of the *Drosophila* brain is its composition of invariant neuronal and  
52 glial lineages, originating from stem cells (neuroblasts) that appear in the early embryo. Embryonic  
53 neuroblasts express specific combinations of transcription factors (TFs), which are thought to  
54 provide each lineage with the information needed to shape the connectivity of its neurons (Urbach  
55 and Technau, 2004; Brody and Odenwald, 2005; Kohwi and Doe, 2014). As a result, lineages become  
56 structural modules: Neurons of the same lineage generally project together in one or two fiber  
57 tracts, and form synapses in specific, spatially restricted brain compartments. Neuron classes of  
58 the CX conform well to the lineage principle. For example, the R-neurons of the ellipsoid body are  
59 derived from one lineage, DALv2 (also called EBa1) (Larsen et al., 2009; Spindler and Hartenstein,  
60 2011; Wong et al., 2013; Yang et al., 2013; Yu et al., 2013; Omoto et al., 2017; 2018). Sublineages  
61 of DALv2 born at different times further tile the bulb (BU) and EB into discrete layers (Omoto  
62 et al., 2018). The columnar neurons of the CX are produced by four pairs of lineages located  
63 in the dorsomedial brain, called DM1/DPMm1, DM2/DPMpm1, DM3/DPMpm2, DM4/CM4 (called  
64 DM1-DM4 henceforward; Ito and Awasaki, 2008; Bello et al., 2008; Ito et al., 2013; Wong et al., 2013;  
65 Yang et al., 2013; Yu et al., 2013). The spatial pattern of these lineages is reflected in the position  
66 at which their corresponding tracts enter and terminate within the CX. In this manner, the four  
67 lineages subdivide the CX neuropils into four evenly sized quadrants, as illustrated in Fig.1.

68 The brain of *Drosophila* and other holometabolous insects arises in two distinct phases. During  
69 the first phase, neuroblasts of the embryo produce a relatively small set of primary neurons which  
70 differentiate and form the larval brain. Most neuroblasts then enter a dormant phase that lasts  
71 towards the end of the first larval instar. Subsequently they reactivate and produce secondary,  
72 adult specific neurons. These cells form axon bundles that form a “blue print” of connections later  
73 established within the adult brain. Differentiation is delayed until metamorphosis, when secondary  
74 neurons, along with re-modeled primary neurons, extend axonal and dendritic branches and  
75 form synapses. In general, primary and secondary neurons of a given lineage show fundamental  
76 structural similarities, whereby projections of secondary neurons follow those of earlier formed  
77 primary neurons (Larsen et al., 2009). Remarkably, the central complex, as defined anatomically for  
78 the adult, is the one major set of compartments of the fly brain that lacks an obvious counterpart  
79 in the larva. Thus, all tangential and columnar neurons with their highly ordered connections  
80 outlined above are secondary neurons born in the larva, prompting the question of what guidance  
81 mechanisms control CX connectivity, and what part primary neurons play during this process.

82 Previous work (Riebli et al., 2013) described a set of embryonically born (i.e., primary) neurons  
83 belonging to the DM1-4 lineages. These neurons, visualized by the expression of R45F08-Gal4  
84 (Jenett et al., 2012), form a commissural tract that becomes incorporated into the fan-shaped  
85 body. Along with the emerging tracts and filopodia extended by secondary neurons of DM1-4  
86 the R45F08-Gal4-positive neurons form a “fan-shaped body primordium” (prFB; Riebli et al., 2013;  
87 Hartenstein et al., 2015). In the present paper, we undertook a detailed analysis of the structure,  
88 differentiative fate, and developmental role of the primary neurons that form the fan-shaped body  
89 primordium, using serial electron microscopy of the early larval brain in combination with confocal  
90 analysis of all stages covering early larva to adult. We show that the neurons of the fan-shaped

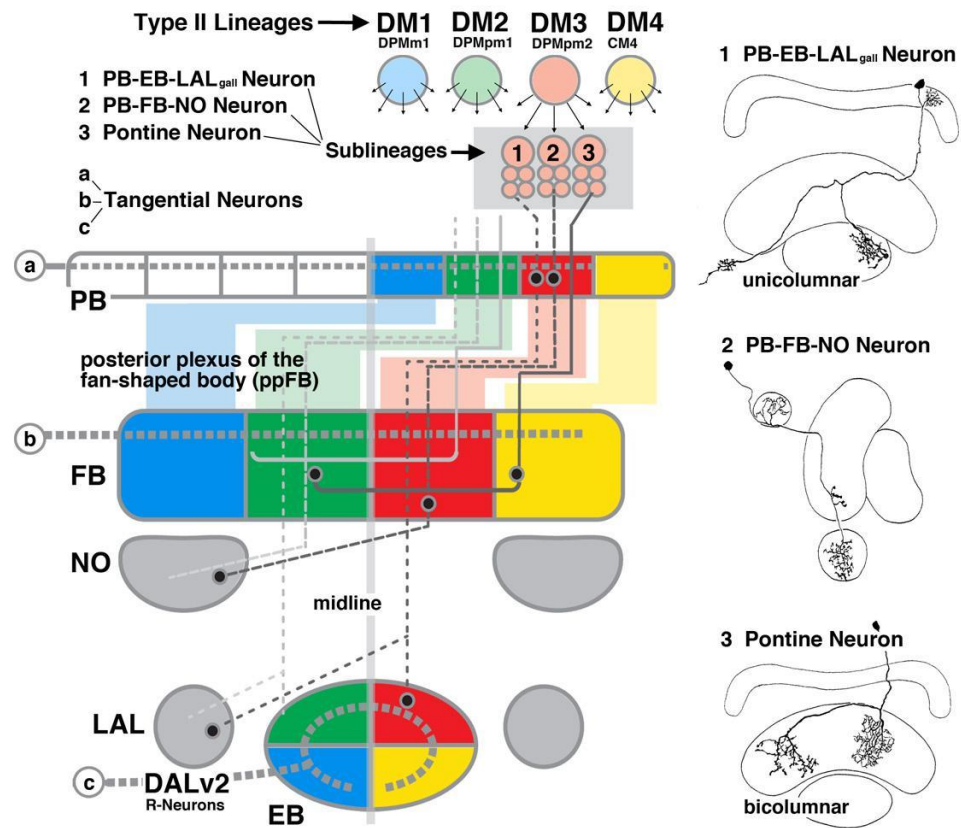

**Fig.1**

**Figure 1.** Connectivity and cell types of the *Drosophila* central complex in the context of neural lineages. Left: Schematic of the central complex, showing its main compartments (PB: protocerebral bridge; FB: fan-shaped body; NO: noduli; EB: ellipsoid body; LAL: lateral accessory lobe). Four bilateral pairs of lineages, DM1-DM4, located in the posterior brain cortex (top), generate the columnar neurons whose axons (grey lines oriented along the vertical axis; filled circles symbolize terminal arborizations) interconnect the compartments of the central complex along the antero-posterior axis in a strict homotopic order. The spatial pattern of DM1-4 is reflected in the position at which their corresponding tracts enter and terminate within the CX, as indicated by the coloring scheme. The four lineages subdivide the CX neuropils into four quadrants; projections of all neurons belonging to one lineage (with the exception of the pontine neurons) are confined to one quadrant. The lineage located furthest laterally, DM4 (yellow), innervates the ipsilateral lateral quadrant; DM3 projects ipsilateral medially (red), DM2 contralateral medially (green), and DM1 contralateral laterally (blue). Columnar neurons are further subdivided into numerous classes according to their projection. The three examples shown include the PB-EB-LAL<sub>gall</sub> neurons (1; hatched line with wide gaps), PB-FB-NO neurons (2; hatched line with narrow gaps) and pontine neurons (3; solid line). These classes may encompass different sublineages, as indicated by small arrows radiating out from the neuroblasts (top). Pontine neurons, as the only class of DM1-4-derived neurons, are restricted to the FB where they interconnect two quadrants. Apart from the columnar neurons, tangential neurons (a, b, c; thick hatched horizontal lines) project across all columns of the CX compartments, and provide input from the lateral brain. Right: Line drawings of the central complex in dorsal view (top, bottom) or sagittal view (center), depicting examples of two unicolumnar neurons (1: PB-EB-LAL<sub>gall</sub> neuron; 2: PB-FB-NO neuron) and a bicolumnar pontine neuron (3; from Hanesch et al., 1989, with permission).

91 body primordium, that we will call fan-shaped body pioneers (FB pioneers) in the following, form  
92 part of a much larger population of early larval brain neurons that are arrested in development,  
93 projecting a simple, thin, unbranched process into the neuropil. The large majority of these neurons  
94 entirely lack synaptic contacts; in a small number of them, a few presynaptic sites are seen.

95 Aside from their undifferentiated neurite arbor, these neurons differ from regular, mature  
96 neurons by the small size of their cytoplasm and nucleus, and the abundance of heterochromatin.  
97 Virtually every brain lineage possesses a complement of the small undifferentiated (SU) neurons.  
98 Our data show further that SU neurons differentiate in the late larva and pupa and give rise to  
99 distinct adult neuron populations; FB pioneers produce the pontine neurons of the fan-shaped  
100 body. Later born secondary neurons of the DM1-4 lineages, destined to form the various classes of  
101 unicolunar neurons of the central complex, fasciculate with the FB pioneers on their pathway  
102 towards and across the midline. However, selective ablation of FB pioneers did not result in  
103 gross abnormalities of the trajectories of unicolunar neurons, suggesting that the initial axonal  
104 pathfinding of the two system of columnar neurons may be controlled independently.

## 105 Results

### 106 Embryonically born neurons arrested prior to terminal differentiation prefigure 107 adult axon tracts

108 Based on size and chromatin structure, four types of neuronal cell bodies can be distinguished in  
109 the brain. The most frequent type is represented by cell bodies of differentiated primary neurons.  
110 These cells measure  $12\text{-}24\mu\text{m}^2$  in cross sectional area; their cytoplasm is relatively voluminous and  
111 electron light (Fig.2A, C). Each cell body projects a single process towards the neuropil. Processes  
112 of neurons of one lineage collect into cohesive bundles, the primary axon tracts (PATs), before  
113 entering the neuropil (Fig.2B; see below). Primary axon tracts continue for variable distances in the  
114 neuropil, before splitting up into individual, branched axon trees forming synapses. The second  
115 type of cell body belongs to mitotically quiescent neuroblasts. Resembling differentiated neurons in  
116 size and shape, neuroblasts can be distinguished from these cells by an electron dense cytoplasm  
117 and chromatin rich nucleus (Fig.2A). Quiescent neuroblasts are also connected to the neuropil by a  
118 single fiber that follows the PAT of its lineage (Lovick et al., 2016); however, unlike differentiated  
119 neuronal axons, these neuroblast-derived fibres end near the neuropil surface.

120 A third type of neural cell body is characterized by its small size, scanty, electron dense cytoplasm,  
121 and heterochromatin-rich nucleus (Fig.2A, E). These small neurons, measuring  $4\text{-}16\mu\text{m}^2$  in cross  
122 sectional area, project fibers which are significantly thinner and more electron-dense than the  
123 axons of differentiated neurons (Fig.2B). They follow differentiated axons into the neuropil, staying  
124 together as a tight bundle, without branching or forming synaptic contacts (Fig.2F, F'). Dense axons  
125 end abruptly with club-shaped endings, often producing short filopodia (Fig.2G, H). We interpret  
126 the small, heterochromatin-rich neurons, which (based on size) are also visible light microscopically  
127 (Fig.2D) as late born neurons which fail to differentiate in the embryo, and therefore call them  
128 "small undifferentiated (SU)" neurons in the following.

129 The fourth type of neural cell is the actively dividing neuroblast, of which the first instar brain  
130 contains five. Four of these neuroblasts are associated with the mushroom body (MB); a fifth one  
131 belongs to lineage BA1c. Active neuroblasts are much larger than quiescent ones; they are located  
132 at the brain surface, and do not possess a process towards the neuropil (not shown). Continued  
133 proliferation of the active MB neuroblasts results in a steady increase in the number of MB neurons;  
134 thus, unlike other lineages, production of MB neurons is not interrupted by a quiescent period  
135 to form a discrete embryonic (primary) phase, separated from a larval (secondary) phase. As a  
136 result, the MB neurons reconstructed in a recent publication (Eichler et al., 2017) show different  
137 degrees of structural maturity, from fully differentiated neurons over "young" neurons with fewer  
138 branches and synaptic contacts to "very young" neurons that resemble SU neurons, having a short,  
139 unbranched fiber that barely reaches the peduncle. Interestingly, the cell body of young and very

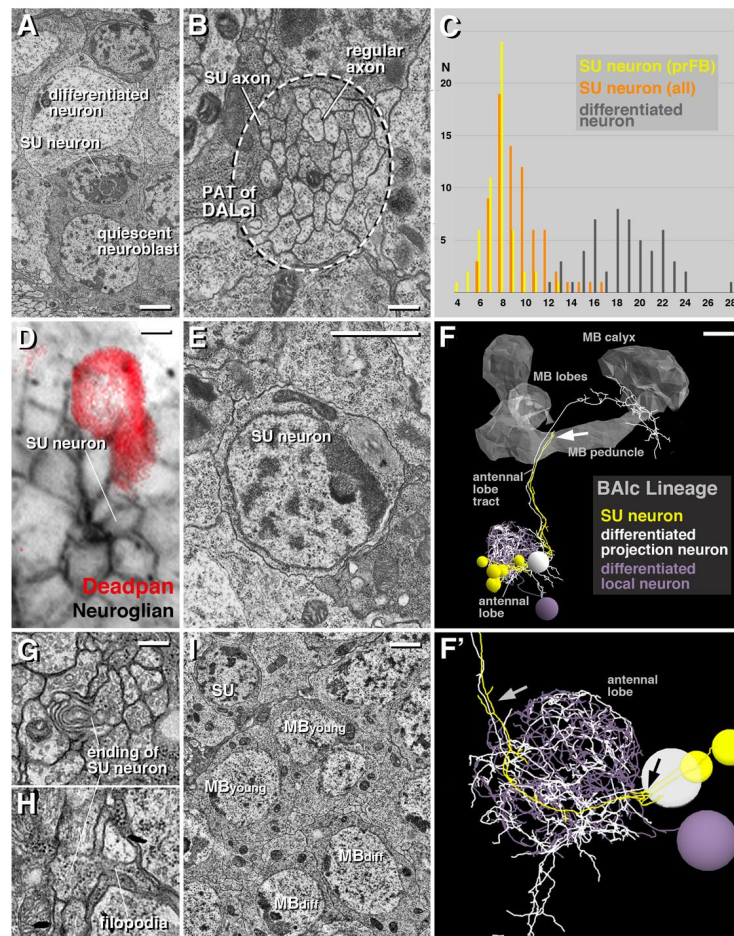

**Fig.2**

**Figure 2.** Structural features of small undifferentiated (SU) neurons in the early larval brain. (A) Electron micrograph of brain cortex illustrating neural cell bodies, including differentiated neuron (top), SU neuron (middle) and quiescent neuroblast (bottom). (B) Electron micrograph of cortex-neuropil boundary, showing bundle of axons (surrounded by hatched line) formed by the axons of the two DALcI lineages as they enter the neuropil. Within this bundle, axons of small undifferentiated neurons (“SU axon”) form coherent contingent of thin, electron dense fibers; they are surrounded by thicker and typically more electron-lucent axons of differentiated neurons (“regular axon”). (C) Histogram showing size distribution of differentiated neurons (grey; number counted =) and SU neurons (orange: all SU neurons of right brain hemisphere; n =; yellow: SU neurons forming fan-shaped body primordium (prFB); n =). Units on horizontal axis are in  $\mu\text{m}^2$  and represent area of cut surface of cell body. (D) Confocal section of brain cortex of first instar larva. Antibody against Neuroglial labels primary neurons (white); anti-Deadpan labels neuroblasts which at this stage start to enlarge and divide. Note clusters of small cell bodies (SU neuron) interspersed among large, differentiated cells. (E) Electron micrograph of cell body of SU neuron, featuring abundant heterochromatin and extremely thin rim of cytoplasm surrounding round nucleus. (F, F') 3D digital model of part of one primary lineage (BAlc), illustrating structural aspects of SU neurons. BAlc includes local interneurons and projection neurons connecting the antennal lobe with higher brain centers (Berck et al., 2016). Shown are one differentiated projection neuron (mPN iACT A1 white) and one differentiated local interneuron (Broad D1:grey) whose dendritic arborizations outline the antennal lobe; the axon of the projection neuron follows the antennal lobe tract. Shown in yellow are the SU neurons which were identified for BAlc. They each form an unbranched axon that follows the axons of the differentiated neurons as they enter the antennal lobe neuropil (black arrow in F') and extends into the antennal lobe tract (grey arrow in F) where they end approximately midway (white arrow in F). The model is presented in lateral view; anterior to the left, dorsal up. The mushroom body (MB) is outlined in grey for spatial reference. (G, H) Electron micrographs show club-shaped endings of SU axons, featuring membrane lamellae (G) and short filopodia (H). (I) Electron micrograph of mushroom body cortex. Shown are two cell bodies of differentiated neurons (MBdiff) located next to two young neurons (MByoung). These show similar size and chromatin structure as differentiated neurons. Bars: 1  $\mu\text{m}$  (A, E, I), 0.25  $\mu\text{m}$  (B, G, H), 2  $\mu\text{m}$  (D), 5  $\mu\text{m}$  (F)

140 young MB neurons does not differ in size or chromatin structure from that of fully differentiated  
141 neurons (Fig.2I). This finding supports the idea that young MB neurons, unlike the SU neurons of  
142 other lineages, do not enter a prolonged phase where differentiation is arrested; instead, they go  
143 directly into differentiation mode and become integrated into a growing mushroom body circuitry.

144 SU neurons are found scattered throughout the brain, but with higher density in the dorsomedial  
145 area, where they form large, coherent clusters (Fig.3A-C). SU neurons amount to a significant fraction  
146 (more than 25%) of the overall number of primary neurons of the brain (Table 1). Almost every  
147 lineage-associated primary axon tract possesses between one and more than 10 of SU axons (Fig.3C;  
148 Table 1). Comparison between left and right brain hemisphere showed that the exact number of SU  
149 neurons accompanying lineages is relatively invariant (Table 1).

150 Axons of SU neurons of a given lineage typically form a tight sub-bundle, often near the center  
151 of a given PAT (Fig.2B). The trajectories of these SU tracts in all cases matched the pathway followed  
152 by primary neurons, as exemplified for the lineage BALc, forming the antennal lobe tract, in Fig.2F.  
153 Based on these trajectories we were able to identify the PATs reconstructed from the L1 EM stack  
154 with lineages defined for the first instar larval brain in previous works (Hartenstein et al., 2015). The  
155 first instar larval brain features more than 50 discrete PAT fiber bundles with characteristic neuropil  
156 entry points and trajectories (Fig.3D). Once digitally reconstructed with CATMAID software; (Saalfeld  
157 et al. 2009, Schneider-Mizell et al. 2016) and displayed in the 3D viewer, PAT fiber bundles can be  
158 compared with those in the light microscopic first instar brain map (Fig.3E), and thus identified as  
159 belonging to specific lineages. Note, as examples shown in Fig.3E, characteristic pattern elements  
160 visible in confocal image and EM stack, such as the branching of the DALcl1/2 tract around lateral  
161 surface of spur (a domain within the mushroom body), or the BAmD1 tract branching anterior to  
162 the mushroom body medial lobe. The neuropil entry points and trajectories of SU neuronal tracts  
163 provide useful landmarks for the ongoing analyses of the first instar larval brain circuitry using the  
164 0111-8 L1 ssTEM volume (Ohyama et al. 2015); both sets of data are presented graphically and  
165 numerically in supplementary figures S2-S9.

### 166 **SU neurons of the four lineages, DM1-DM4, form a glia ensheathed fan-shaped** 167 **body primordium in the first instar larva**

168 In the dorso-medial domain of the brain, which houses all lineages later giving rise to the columnar  
169 neurons of the central complex (the type II lineages DM1-DM4; Bello et al., 2008), SU neurons form  
170 large clusters of cells (Fig.4A). Based on axonal trajectory we were able to recognize the individual  
171 DM lineages and their associated SU neurons. DM1-4 are aligned along the brain midline, with DM1  
172 occupying the most anterior, and DM4 the most posterior position (Fig.4B, C). For each of the DM  
173 lineages, SU neurons form several subpopulations with axons following different pathways (Fig.4D).  
174 Axons of one SU subpopulation per DM lineage, containing between 5 and 7 neurons, converge on  
175 a shared commissural bundle that crosses the brain midline in the center of the supraesophageal  
176 commissure (Fig.4E, F). This bundle stands out from surrounding tracts by its higher electron density,  
177 being composed almost entirely of thin SU axons (Fig.4G, H); furthermore, two paired glial cells  
178 ensheath the bundle on all sides (Fig.4H, I). Aside from the subpopulations of SU neurons of DM1-4,  
179 three other SU axons join the bundle. One of these is derived from another type II lineage, CP2  
180 (DL1); the other two originate as part of the lineage DPMm2 (Fig.4E, F).

181 For late larvae, the *pointed* enhancer fragment Gal4-driver R45F08-Gal4 has been reported to be  
182 expressed in small subpopulations of neurons of DM lineages whose axons form a glia-covered  
183 commissural structure that will enlarge into the fan-shaped body, and was therefore called fan-  
184 shaped body primordium (prFB; Riebli et al., 2013). In first instar larvae, R45F08-Gal4 highlights  
185 four paired clusters of neurons in the dorso-medial brain whose axons form a thin tract that, in  
186 regard to size, central location within the brain commissure, and glial enclosure corresponds to  
187 the structure identified electron microscopically (Fig.4J-L). We conclude that the fan-shaped body  
188 primordium is formed in the embryo by four paired sets of small undifferentiated neurons which  
189 we will call “fan-shaped body pioneers” (FB pioneers) in the following.

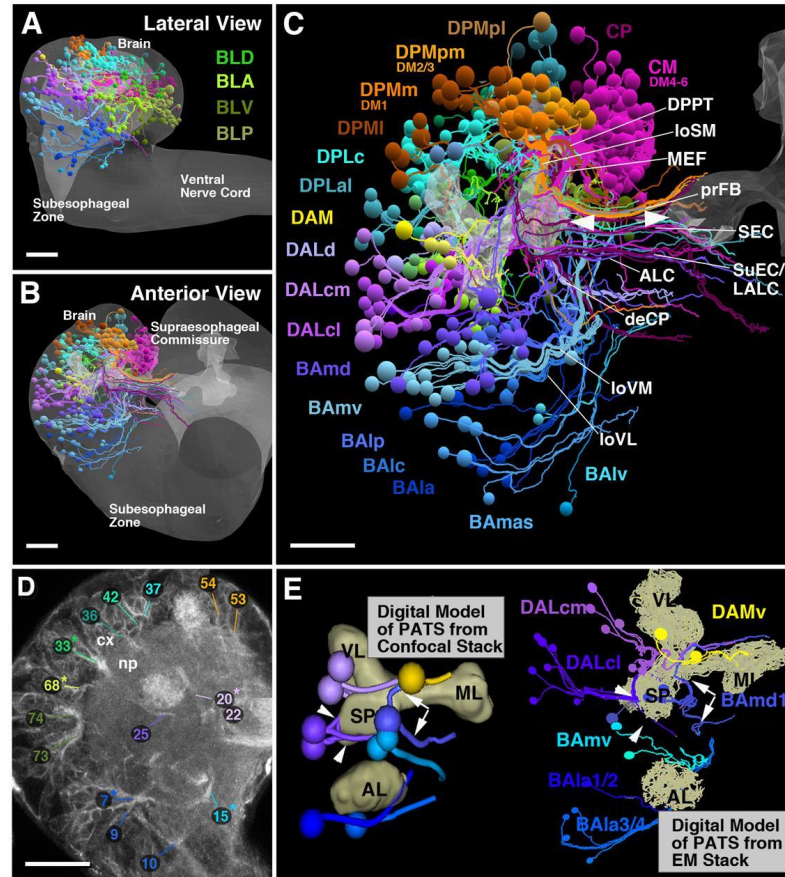

**Fig.3**

**Figure 3.** Pattern of SU neurons and primary axon tracts (PATs) in the early larval brain. (A-C) 3D digital model of first instar larval brain in lateral view (A; anterior to the left, dorsal up) and anterior view (B, C; dorsal up). Cell bodies and axons of all SU neurons of one hemisphere are shown as colored spheres and lines. Differential coloring indicates association of SU neurons with spatially contiguous groups of lineages; labels of lineages are shown in corresponding colors (A, B; for nomenclature of lineages see Hartenstein et al., 2015). In (A, B), outline of brain and ventral nerve cord is rendered in grey; in (C), outlines of mushroom body lobes, located in center of neuropil, are shaded, with tips of left and right medial lobe pointed out by arrowheads. Note that lineage-associated bundles of SU axons follow discrete fascicles identified for the brain throughout development. Among the examples made explicit are the BAmv axons that form the longitudinal ventromedial fascicle (IoVM); axons of BAlp constitute the longitudinal ventro-lateral fascicle (IoVL); DALd axons form the central protocerebral descending fascicle (deCP); CM lineages the medial equatorial fascicle (MEF); DPMpm the longitudinal superior-medial fascicle (IoSM) and primordium of the fan-shaped body (prFB). (D, E) Primary lineage tracts imaged light microscopically can be identified with electron microscopically reconstructed SU axon tracts. (D) shows representative frontal confocal section of early larval brain; primary neurons and their axon tracts are labeled by anti-Neuroglian (white). Primary axons converge at the cortex (cx)-neuropil (np) boundary at invariant positions to form tracts with characteristic trajectories. A subset of tracts, reconstructed from a confocal stack of an anti-Neuroglian labeled brain hemisphere, is shown on the left side of panel (E). The mushroom body lobes (ML medial lobe; SP spur; VL vertical lobe) and antennal lobe (AL) is shown for reference. Right side of (E) shows groups of SU neurons whose axon bundles can be identified with the lineage tracts on left side; note for example axon tract of DALcl which approaches the spur from laterally, and then bifurcates to continue dorsally and ventrally of the spur (white arrowheads). The example pointed out by white arrows represents the tract of BAm1 which approaches the medial lobe from anteriorly and then bifurcates into a dorsal and ventral branch; both branches turn medially to form distinct commissural tracts. For all abbreviations see Table 1. Bars: 20 $\mu$ m type II lineage, CP2 (DL1); the other two originate as part of the lineage DPMm2 (Fig.4E, F).

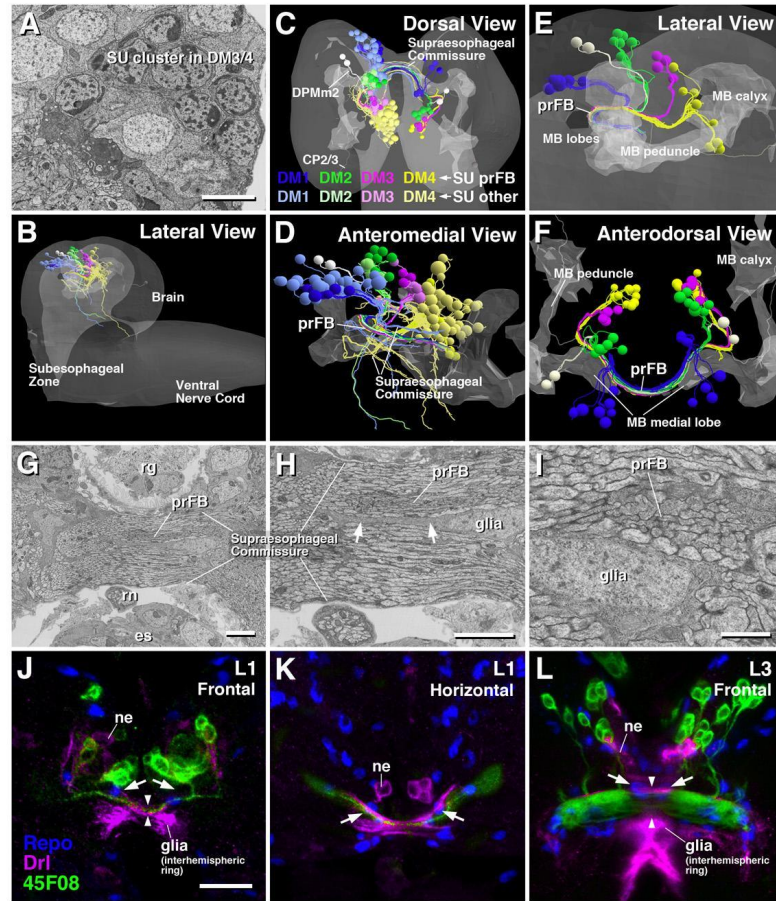

**Fig.4**

**Figure 4.** SU neurons of lineages DM1-4 form the primordium of the fan-shaped body (prFB). (A) Electron micrograph of dorso-medial brain cortex showing clusters of contiguous SU neurons associated with lineages DM1-4. (B-F) Digital 3D models of first instar brains showing SU neurons associated with DM1-4 rendered in different colors (DM1 blue; DM2 green; DM3 magenta; DM4 yellow). In all models, outline of mushroom body (representing center of brain neuropil) is rendered in light gray; in (B, C, E), outline of brain is shown in dark gray. In (B-D), all SU neurons of DM1-4 are included in models; subsets of SU neurons contributing to the prFB are shown in saturated colors, other SU neurons are rendered in light colors. In (E, F), only prFB-associated SU neurons are shown. (G-I) Electron micrographs of brain midline with supraesophageal commissure. The prFB appears as a bundle of electron-dense axons (G, H) embedded in fascicles of lighter axons belonging to differentiated neurons. Glial lamella flanks the prFB (arrows in H). Note conspicuous, medially located nucleus of glial cell right adjacent to the prFB. (J-L) Z-projections of frontal (J, L) or horizontal (K) confocal sections of first instar brain (J, K) and late third instar brain (L). Glial nuclei are labeled by anti-Repo (blue); glia surrounding supraesophageal commissure (=interhemispheric ring glia) is labeled by Drl-lacZ (magenta); neurons of prFB are marked by driver line R45F08-Gal4>UAS-mcd8GFP (green). Interhemispheric ring glia forms several channels containing individual commissural fascicles. One channel contains the R45F08-Gal4-positive axon bundle constituting the prFB [arrowheads in (J, L)]. This channel widens as prFB gains in volume towards late larval stages (L). Note pair of large glial nuclei (arrows) located near the midline, posteriorly adjacent to the prFB. These cells correspond in shape, size and position to the prFB-associated glial cells that appear in electron micrographs (see panels H, I). Other abbreviations: es esophagus; ne Drl-lacZ-positive neurons; rn recurrent nerve; rg ring gland. Bars: 2 $\mu$ m (A, G, H); 1 $\mu$ m (I); 10 $\mu$ m (J-L)



190 **FB pioneers are topologically ordered and give rise to the pontine neurons of the**  
191 **fan-shaped body**

192 FB pioneer neurons exhibit a strict topological order with regard to the position and average length  
193 of axons. Axons of neurons of a given DM lineage remain together as a bundle throughout the  
194 length of the prFB (Fig.5A-C). The DM1 bundle enters anteriorly and dorsally, and remains at the  
195 dorsal edge of the prFB, followed by DM2, DM3 and DM4, which is located most ventrally (Fig.5C-E).  
196 DM4 axons are the shortest, most of them ending before reaching the midline (Fig.5B, J). Axons of  
197 DM1-DM3 cross the midline but extend across for various distances, in correlation to their lineage  
198 identity: DM1 axons cross furthest, followed by DM2 and DM3 (Fig.5B, J).

199 Using the R45F08-Gal4 driver we followed the prFB neurons through larval and pupal devel-  
200 opment into the adult (see below), and generated single cell MCFO clones (Nern et al., 2015) to  
201 visualize their morphology as differentiated cells. All neurons forming the early larval prFB give rise  
202 to pontine neurons, recognizable by their regular bi-columnar organization within the fan-shaped  
203 body (Fig.5F-I). Labeled neurons match the four-fold symmetric scheme elaborated by Hanesch et al.  
204 (1989) for pontine neurons, whereby neurons entering the FB most laterally (DM1; Yellow in Fig.5H,  
205 I) branch near their point of entry in the lateral column "A", then cross the midline, and have their  
206 second arborization in a column right next to the midline ("E"; Fig.5K, from Hanesch et al., 1989).  
207 Neurons of DM1 (blue in Fig.5F, G), as well as DM3 and DM4 (green and yellow, respectively, in  
208 Fig.5H, I) have a similar structure, innervating staggered pairs of columns, with one column always  
209 ipsilaterally relative to the location of cell bodies, and one contralaterally (Fig.5K). Note that the  
210 length distribution of SU axons of DM1-DM4 coincides with the adult pattern already in the early  
211 larva: DM4 axons are shortest, barely reaching the midline; DM1 axons are longest (compare Fig.5J,  
212 K)

213 **Later born columnar neurons of DM1-DM4 follow the trajectory prefigured by the**  
214 **FB pioneers**

215 R45F08-Gal4-positive axons of FB pioneers can be followed throughout larval and pupal develop-  
216 ment into the adult stage. Until 48h after hatching (L48), the prFB formed by these axons remains  
217 as a single axon bundle located in the center of the brain commissure (Fig.6A). At this stage, the  
218 secondary phase of neuron production has commenced (Lovick and Hartenstein, 2015). DM1-DM4  
219 form secondary axon tracts, labeled by anti-Neurotactin, that grow along the R45F08-Gal4-positive  
220 (and neurotactin-negative) FB pioneers (Fig.6B, B', C, C').

221 The size and appearance of the prFB changes at later larval stages. Around 72h after hatching,  
222 the number of neurons labeled by R45F08-Gal4 has increased over that counted at 24h (Fig.6D, E),  
223 and many of these newly R45F08-expressing neurons form part of the Neurotactin-positive clusters  
224 of secondary neurons (Fig.6F-G'). In addition, a notable change in the structure of the prFB has  
225 taken place, whereby the initially coherent tract of primary FB pioneers has split into several thinner  
226 bundles (Fig.6G, G'). The spaces in between these is filled by the secondary, Neurotactin-positive  
227 axons of DM1-4 (Fig.6G'), which give rise to the uni-columnar neurons of the central complex.  
228 Several markers for the major classes of uni-columnar neurons exist, among them the Gal4-drivers  
229 R9D11-Gal4 (Jenett et al., 2012; Riebli et al., 2013), R19B02-Gal4 (Jenett et al., 2012; Wolf et al., 2015;  
230 Omoto et al., 2017), and R83B12-Gal4 (Jenett et al., 2012; Wolff et al., 2015; Omoto et al., 2017; this  
231 study). R19B02 is expressed in several classes of neurons connecting PB, dorsal FB, and EB with  
232 the neuropil laterally adjacent to the central complex (PB-EB-gall and PB-FB-rub neurons of Wolff  
233 et al., 2015; supplementary Fig.S1B); R83H12 is expressed in neurons connecting the PB, ventral  
234 FB, EB and the NO (PB-FB-NO and PB-EB-NO neurons of Wolff et al., 2015; supplementary Fig.S1C).  
235 In conjunction with R45F08-Gal4, these markers allowed us to discern the distribution of pontine  
236 versus uni-columnar neurons in the prFB of the late larva, as presented below.

237 In the late larva, the fan-shaped body primordium occupies a sizeable volume as a result of the  
238 ingrowth of secondary axons, in conjunction with the formation of tufts of filopodia that prefigure

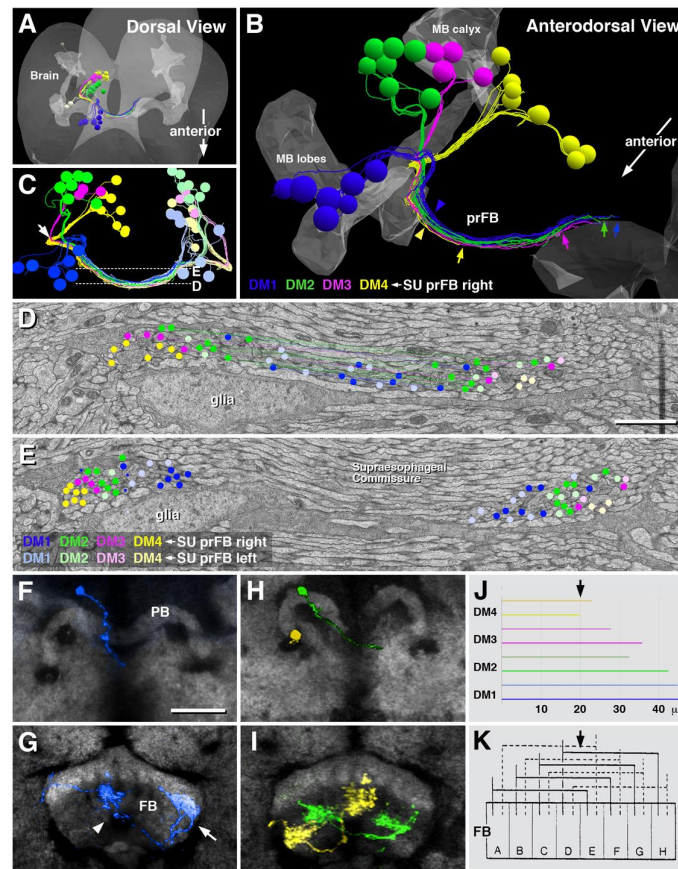

**Fig.5**

**Figure 5.** Topological order and developmental fate of FB pioneers. (A-C) Digital 3D model of the EM larval brain showing FB pioneers rendered in different colors. The mushroom body (MB) is rendered in gray for reference. (A) and (B) show FB pioneers of the right hemisphere; in (C), right hemispheric FB pioneers appear in saturated colors, left hemispheric ones in light colors. (D, E) Electron micrographs of prFB sectioned at the two planes shown by hatched lines in panel (C). Sectioned profiles of FB pioneers were assigned to their cell bodies of origin and are demarcated by circles, color coded following the same scheme used in the 3D digital models in (A-C). Axons belonging to a lineage form a coherent bundle within the prFB. Note that bundles of corresponding lineages of the left and right hemisphere project together (light blue circles are closest to saturated blue circles, etc). (F-I) Frontal confocal sections of central complex of adult brain, showing single cell clones of neurons descended from FB pioneers. (F, H) are sections at the level of the protocerebral bridge (PB), (G, I) at the level of the fan-shaped body (FB). Labeled clones (for technique, see Material and Methods) are color coded following the same scheme used in panels (A-E). (F, G) show a pontine neuron of lineage DM1 (blue), with a medially located cell body and axon entering at the medial PB (F), and terminal axons branching in an ipsilateral medial column (arrowhead in G) and a contralateral lateral column (arrow in G). (H, I) show a DM4 clone (yellow) and DM2 clone (green). (J) Histogram depicting average length of FB pioneer axons belonging to lineages DM1-4. Upper horizontal bar of each pair belongs to left hemispheric lineage, lower bar to corresponding right hemispheric lineage. The sharp medial turn of axon as it enters the prFB (white arrow in panel C) was taken as origin on x-axis; arrow at top demarcates brain midline. (K) Schematic of Hanesch et al. (1989), showing fan-shaped body (FB) divided into eight columns (A-H; arrow at top indicates midline). Based on Golgi-preparations, Hanesch et al. distinguished between four classes of bi-columnar pontine neurons, indicated by solid lines on left side, and hatched lines on right side. Our data indicate that the four classes described by Hanesch et al. correspond to the four lineages of origin of the pontine neurons. Bars: 24 $\mu$ m (D, E); 25 $\mu$ m (F-I)

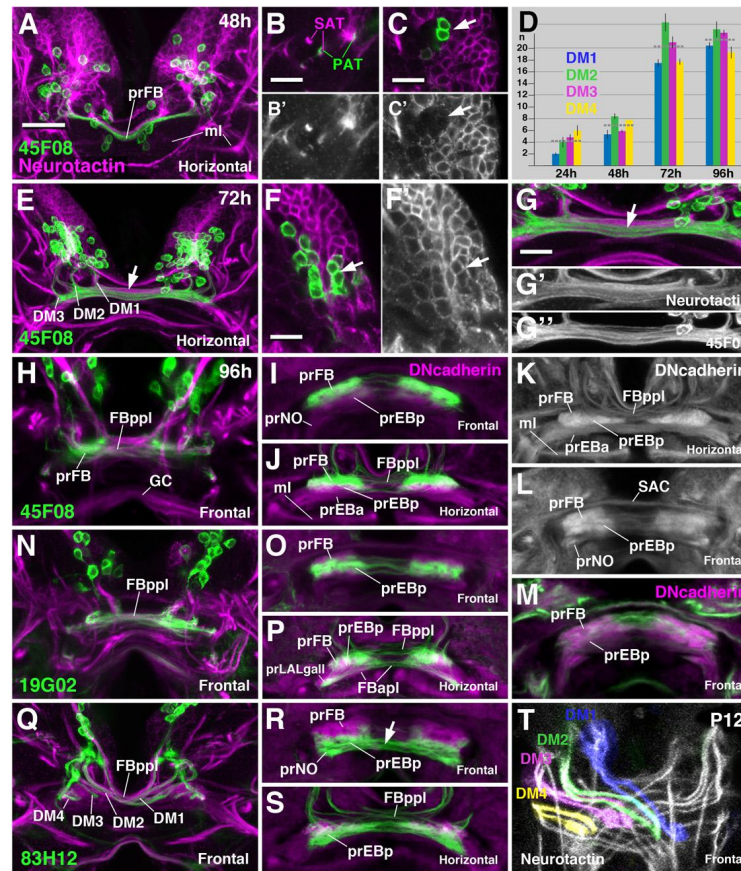

**Fig.6**

**Figure 6.** Growth and development of the prFB during the larval period. Panels show Z projections of frontal or horizontal confocal sections of larval brains at different stages (48h, 72h, 96h after hatching). Global labeling of secondary (larvally born) neurons with anti-Neurotactin (magenta in A-C, E-G, H, N, Q; white in B', C', F', G', T) or neuropil with anti-DNcadherin (magenta in I, J, M, O, P, R, S; white in K, L). FB pioneers are labeled by R45F08-Gal4>mcd8UAS-GFP (green in A-C, E-J). (A-C) At 48h (second larval instar) FB pioneers form a single bundle as in freshly hatched first instar (see Fig.4), K). The outgoing secondary axons tracts (SATs) of DM1-4 (magenta in B) fasciculate with FB pioneers (green in B). At this stage, R45F08-Gal4 expression is still confined to Neurotactin-negative primary FB pioneers (C, C'). (D) Average numbers and standard deviations of R45F08-Gal4-positive DM1-4 neurons between 24 and 96h after hatching (n=5). Horizontal hatched lines give average for all four DM lineages. (E-G") At 72h after hatching (early third instar) the FB pioneer axons have split into several commissural bundles (arrow in E, G). Gaps between these bundles are filled with Neurotactin-positive secondary fibers formed by lineages DM1-4 (G-G"). Numerous Neurotactin-positive secondary neurons have joined the set of R45F08-Gal4-positive FB pioneers (arrow in F, F'). (H-L) At 96h after hatching (late third instar) secondary DM1-4 axons have increased in number and form a system of crossing bundles, the posterior plexus of the fan-shaped body (FBppl in H, J, K). Both R45F08-Gal4-positive FB pioneers and secondary axons display tufts of filopodia which appear as DNcadherin-positive domains (prFB, prEBp, prEBa in panels I-L). (M-P) Labeling of secondary PB-FB-LALgall and PB-EB-LALgall neurons by R19G02-Gal4 driver. Terminal filopodia of these neurons are found in ventral prFB, prEBp and prLALgall (see also Lovick et al., 2017). (Q-S) R83H12-Gal4 is expressed in a different subset of secondary neurons, mainly PB-FB-NO and PB-EB-NO. Note in (Q) chiasmatic architecture of projection of labeled neurons towards the fan-shaped body, with all four bundles turning medially, but only DM1 and DM2 crossing towards contralaterally, and DM3/4 remaining ipsilaterally. This chiasmatic projection is typical for all unicolunar neurons, as demonstrated in (T; 12h after puparium formation), where anti-Neurotactin (white) globally labels massive bundles of secondary axons of DM1-4. Bar: 25µm (for all panels except B-C', F-G"); 10µm (for B-C', F-G").

239 the fan-shaped body and noduli. Primary and secondary axon tracts of DM1-DM4 form a plexus of  
240 fiber bundles at the posterior surface of the fan-shaped body primordium (posterior plexus of the  
241 fan-shaped body (FBppl) in Fig.6H, J, K). Within this plexus, the R45F08-Gal4-positive pontine neuron  
242 precursors appear as thin axon bundles crossing the midline (Fig.6H, J). Also secondary tracts of  
243 uni-glomerular neurons, including the 83H12-positive PB-FB/EB-NO neurons and 19G02-positive  
244 PB-EB/FB gall neurons, cross in the posterior plexus, forming a system of chiasmata that establish  
245 the characteristic, modular connectivity of the fan-shaped body and ellipsoid body (Fig.6N, P, Q,  
246 S, T). Tracts of DM1 and DM2 cross the midline to terminate in the lateral and medial half of the  
247 contralateral prFB, respectively; those of DM3 and DM4 remain ipsilateral, targeting the medial and  
248 lateral half of the ipsilateral prFB, respectively (Fig.6Q, T; see also Boyan et al., 2017).

249 In addition to the posterior plexus of axons, the late larval fan-shaped body contains voluminous  
250 tufts of filopodia, visible by their high expression levels of DN-cadherin (Riebli et al., 2013; Omoto  
251 et al., 2015; Lovick et al., 2017). These tufts outline three bar-shaped neuropil domains (Fig.6K, L,  
252 M). The domain located dorsally and posteriorly will give rise to the neuropil of the fan-shaped  
253 body proper (prFB). Accordingly, filopodia of R45F08-Gal4-positive precursors of pontine neurons  
254 are restricted to this dorsal compartment (Fig.6I, J). Located further anteriorly and ventrally is the  
255 primordium of the posterior ellipsoid body (prEBp; Lovick et al., 2017); the primordia of the noduli  
256 (prNO) form two ventrally-directed appendages of the prFB (Fig.6L). 19B02-positive secondary  
257 neurons, which in the adult brain branch within the FB as well as the posterior EB, fill a volume  
258 straddling the boundary between both domains (Fig.6O, P). 83H12-positive filopodia of presumptive  
259 PB-EB/FB-NO neurons are concentrated in the most ventral domain of the prFB, the prEBp and  
260 the prNO (Fig.6R, S). Axons of these neurons form thick chiasmatic fiber systems that extend in  
261 between the ventral surface of the prFB and the prNO of either side (Fig.6R).

### 262 **Ablation of the FB pioneers**

263 Given the early appearance of precursors of the pontine system, and its intimate spatial relation-  
264 ship with the subsequently generated unicolumnar neurons, we sought to establish the effect  
265 of ablating the former by using the R45F08-Gal4 construct to express UAS-hid;rpr in the FB pio-  
266 neers. Activating the pro-apoptotic construct between 24h and 48h after hatching by inactivation of  
267 temperature-sensitive Gal80ts, efficiently ablated the FB pioneers; it also resulted in a high rate of  
268 lethality during larval stages, which is likely due to expression of R45F08-Gal4 in other tissues (V.H.,  
269 unpublished observation). No late pupa or adult flies under these circumstances survived, whereas  
270 non-temperature shifted controls were completely viable. The late larval prFB of the surviving FB  
271 pioneer-ablated larvae showed a characteristic structural phenotype. All elements of the prFB  
272 described above could still be recognized; however, the DN-cadherin-rich primordia of fan-shaped  
273 body and posterior ellipsoid body/noduli were separated by a wider gap (arrowheads in Fig.7B, E,  
274 E'). In addition, the posterior plexus of the fan-shaped body, normally formed by a loose assembly  
275 of "wavy", thin bundles (Fig.7A, C), appeared as thick, smooth cable of axons (Fig.7D, F). We conclude  
276 that FB pioneers, possibly by establishing an early connection between the left and right half of  
277 the prFB through their crossing axons, play a structural role in pulling these halves together into a  
278 united structure (Fig.7I, J). Aside from this function, there does not appear to be an effect on the  
279 formation and pathway choices of the later born secondary axons: these split into several sub  
280 bundles and projected into the prFB in a pattern that showed no gross abnormalities compared to  
281 the control (Fig.7G, H). This result suggests that axonal pathfinding of the two systems of small field  
282 neurons of the central complex, i.e., the uni- and bi-columnar neurons, is controlled independently.

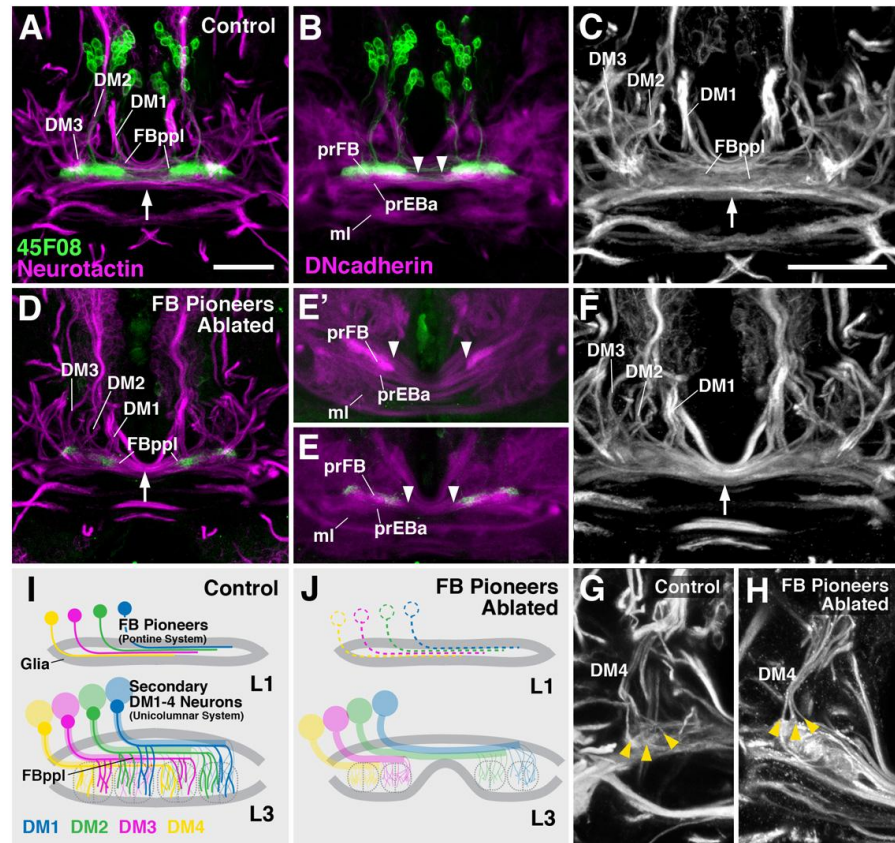

**Fig.7**

**Figure 7.** Structure of the prFB after ablation of FB pioneers. (A-C) Z-projections of horizontal confocal sections of wild-type late third instar brains, illustrating entry of lineages DM1-3, posterior plexus of fan-shaped body (FBppl), and filopodial tufts forming primordia of fan-shaped body neuropil (prFB) and ellipsoid body neuropil (prEBa). For a clear depiction of the FB pioneers, males lacking *UAS-hid;rpr* and *tub-Gal80ts* are shown. (D-F) Same views of late larval brain as in (A-C) after ablation of FB pioneers by activating *UAS-hid;rpr* from 24-48h with *R45F08-Gal4*. (E and E') show two different representative specimens. Note that FBppl is reduced in diameter (arrow in D, F) compared to control (arrow in A, C). Also primordium of fan-shaped body neuropil (prFB in B, E, E') is separated by wider gap in ablated specimens (arrowheads in B, E, E'). (G, H) Z-projection of horizontal confocal sections of one brain hemisphere of control (G) and ablated (H) specimen, showing normal branching pattern of secondary axon bundles of DM4 lineage (yellow arrowheads). The neurotactin and Dncadherin pattern of non-temperature shifted female controls (which contain *UAS-hid;rpr* and *tub-Gal80ts*), in which no ablation occurred, were indistinguishable from A-C, G (not shown). (I, J) Schematic fan-shaped body primordium at first larval instar (L1) and late third instar (L3) in control (I) and ablated specimen (J). Bars: 25 μm (A, B, D-E); 10 μm (C, F, G, H)

283 **Discussion**

284 **Primary small undifferentiated neurons form a large neuron population of the**  
285 **early larval brain**

286 Our analysis demonstrates that a large fraction of the neurons of the early *Drosophila* larval brain  
287 does not elaborate a branched neurite arbor and synaptic connections. This finding came as a  
288 surprise; it had been well established that the large number of neurons produced during the  
289 secondary, larval phase of neurogenesis remain undifferentiated until the onset of metamorphosis,  
290 resembling in many ways the SU neurons described here (Truman, 1990; Dumstrei et al., 2003;  
291 Truman et al., 2004; Peraanu and Hartenstein, 2006), but the same was not assumed for so many  
292 of the embryonically generated primary neurons. Previous studies had shown that in the thoracic  
293 ganglia, a subset of presumptive adult peptidergic neurons (Veverlytsa and Allan, 2012) and motor  
294 neurons (Zhou et al., 2009) show a SU phenotype, extending a truncated axon into the peripheral  
295 nerve, but failing to form synaptic connections to the musculature. These embryonically born  
296 neurons, which transiently express the transcription factor Broad-Z3, differentiate along with  
297 the larvally born motor neurons and form dendritic and axonal branches and synapses in the  
298 pupa. Due to their delayed differentiation, typical for secondary neurons, Zhou et al. (2009) term  
299 these embryonically born thoracic SU neurons “embryonically born secondary neurons”. To avoid  
300 confusion, we will stick to the convention that defines all neurons born during the embryonic period  
301 as primary neurons, and call them “primary SU neurons”.

302 The existence of SU neurons (primary or secondary) is most likely tied to the holometabolous  
303 life cycle of *Drosophila* where, in terms of structure and function, the larval body (formed in the  
304 embryo) differs strongly from the adult body (formed in the larva and pupa). The proliferation of  
305 adult-specific cells and organs that takes place in the larva is separated from the differentiated larval  
306 structures, possibly in order to prevent interference between novel growth and organ function. In  
307 case of the musculature, for example, proliferating adult myoblasts form clusters of cells attached  
308 to the peripheral nerves or imaginal discs, outside the larval musculature (Bate, 1993). Neuroblasts  
309 generating adult specific neurons are part of the larval brain, but their progeny are arrested in  
310 the immature SU state until the onset of metamorphosis, when, under the influence of ecdysone  
311 signals, all neurons start branching and generating synaptic connections (Lee et al., 2000; Brown  
312 and Truman, 2009; Brown et al., 2006; Veverlytsa and Allan, 2012; 2013). If that were not the case,  
313 that is, if secondary neurons would continuously differentiate according to their birth date (like  
314 regular primary neurons in the embryo), they would constantly and in growing numbers intrude  
315 into existing larval circuits, possibly leading to disruptions in functioning of these circuits. It is  
316 conceivable that the occurrence of primary SU neurons can be explained by the same reasoning.  
317 Based on their (mostly) superficial position, we assume that primary SU neurons are born during  
318 the final rounds of embryonic neuroblast divisions. It could be speculated further that there is a  
319 “cut-off” line that limits neurons’ ability to commence differentiation, and that this cut-off line falls  
320 before the time interval during which primary SU neurons are born, thereby preventing the latter  
321 from differentiating.

322 In support of the notion that the presence of SU neurons is an attribute of holometabolous  
323 insects, such cells have not been observed in locusts or other hemimetabolans for which neuro-  
324 developmental observations have been made. A good number of central neurons of the brain and  
325 VNC that were followed throughout development show continuous growth and arborization of  
326 their neurite tree (e.g., Bentley and Toroian-Raymond, 1981; Meier et al., 1993). This also includes  
327 the unicolumnar neurons of the central complex which, in *Drosophila*, are all born as secondary  
328 neurons and undergo a phase of developmental arrest in the larva. In grasshopper, the homologous  
329 neurons mature continuously between mid- and late embryonic stages, to form part of a functional  
330 central complex right after hatching of the embryo (Boyan and Reichert, 2011).

331 *Drosophila* SU neurons described in this paper exhibit structural characteristics that are similar  
332 to those described for neuronal precursors in the developing vertebrate brain. Thus, postmitotic

333 neuronal precursors of the neocortex or hippocampus, while migrating along radial glia, are small,  
334 electron-dense cells with hetero-chromatin-rich nuclei and scant cytoplasm. Typically, they exhibit  
335 a bipolar shape, extending a leading and trailing process that are in contact with the radial glia  
336 (Eckenhoff and Racic, 1984). The same phenotype is observed in neuronal precursors (“D-cells”)  
337 that are generated in the subgranular zone of the hippocampus in adult mammals (Seri et al.,  
338 2004; Ngwenya et al., 2006; 2008). As neurons mature, forming dendrites and axons, nuclear  
339 and cytoplasmic size increase, and cells become transcriptionally more active, with a concurrent  
340 reduction in heterochromatin. Experimental studies have shown that a variety of signaling pathways  
341 and receptors for neurotrophic factors become activated by proteins forming part of the complex  
342 cell cycle-controlling molecular machinery (Lee et al., 1994; Cicero and Herrup, 2005; Kawachi et al.,  
343 2013). However, the specific mechanism that drives the transition from small, heterochromatin-rich  
344 neural precursor to differentiated neuron is little understood. In human and mouse, mutations in  
345 the MECP2 protein, which encodes a transcriptional repressor, is associated with a reduction or  
346 delay of neuronal maturation (Rett Syndrome; Shahbazian et al., 2002; Martinez de Paz and Ausio,  
347 2017). The gene network (of which MECP2 may form part) that accompanies neural precursor  
348 maturation has not been established. In *Drosophila*, this mechanism is embedded into the ecdysone  
349 hormonal cycle that controls larval growth and metamorphosis in general. It has been shown  
350 that different isoforms of the ecdysone receptor (EcR) are expressed and required for different  
351 developmental changes that occur in the nervous system. The EcRB1 and EcRB2 isoforms are  
352 expressed in primary neurons that undergo remodeling, including the gamma neurons of the  
353 mushroom body (Schubiger et al., 1998; Lee et al., 2000), and blocking this receptor will result  
354 in defects of remodeling. In contrast, EcR-A appears to be more dedicated to guide secondary  
355 neurons through their maturation and maintenance (reviewed in Brown et al., 2009). The level of  
356 ecdysone and its receptors are under the control of developmental paracrine signals, such as in  
357 case of the mushroom body cells which produce an activin signal to maintain EcR-B1 levels (Zheng  
358 et al., 2003). In addition, intrinsic determinants expressed sequentially in the dividing neuroblasts  
359 form part of a feed-back mechanism with the ecdysone cycle (Syed et al., 2017). SU neurons in  
360 the *Drosophila* larval brain may present a favorable paradigm to study the process of neuronal  
361 maturation downstream of the ecdysone cycle. SU neurons represent a major population at the  
362 early larval stage (primary SU neurons) and late larval stage (primary and secondary SU neurons),  
363 and can be labeled by specifically expressed factors (e.g., Broad-Z3), which should make them  
364 amenable to FACS sorting and systematic gene expression screens.

### 365 **SU neurons and the central complex**

366 Most neuropil compartments of the adult *Drosophila* brain have a corresponding larval counterpart  
367 (Younossi-Hartenstein et al., 2003; Peraanu et al., 2010); outgrowing fibers of secondary neurons,  
368 which form much of the volume of the adult compartments, follow their primary siblings and  
369 establish dendritic and axonal branches around this primary scaffold. This principle does not apply  
370 to the secondary neurons forming the central complex, for which no anatomically defined larval  
371 counterpart exists. Small primordia of the different compartments of the central complex and  
372 associated structures (i.e., the bulb and anterior optic tubercle, which relay input to the central  
373 complex; Lovick et al., 2017) can be first detected at the late larval stage. These larval primordia of  
374 the central complex compartments are formed by the fiber bundles and associated filopodia of the  
375 secondary lineages which will develop into the central complex of the adult brain. The minute early  
376 larval prFB, formed by the FB pioneers described in the present paper, represent an exceptional  
377 case. Thus, FB pioneers are primary neurons whose axons extend during the late embryonic phase  
378 and gather into a tight commissural bundle located in the center of the crossing fiber masses that  
379 constitute the supraesophageal commissure of the early larval brain. Several aspects of the prFB  
380 deserve special comment.

381 (1) From late embryonic stages onward the FB pioneer axons are enclosed by an exclusive glial  
382 layer formed by the so called interhemispheric ring glia (Simon et al., 1998). Several pairs of primary

383 glia, located close to the brain midline, make up the interhemispheric ring. Processes of these glial  
384 cells assemble into an invariant pattern of sheaths around several individual commissural bundles.  
385 Posteriorly, glial processes form two channels, a ventral one containing the great commissure, and  
386 a dorsal one, dedicated to the prFB (Lovick et al., 2017; this paper). This dorsal channel conducting  
387 the prFB stands out by a pair of glial nuclei attached to its posterior-medial wall (Fig.4); we could  
388 unequivocally identify a pair of glial nuclei at that position in the serial EM stack (Fig.4). As the larva  
389 grows and secondary tracts of DM1-4 are added to the FB pioneer bundle, the glial channel widens.  
390 This volumetric increase continues throughout metamorphosis, and eventually the interhemispheric  
391 ring glia accommodates the entire fan-shaped body. Similar to other primary neuropil glia, the  
392 interhemispheric ring undergoes apoptotic cell death during mid-pupal stages (Simon et al., 1998;  
393 Omoto et al., 2015), and is replaced by a much larger number of small secondary glia that surround  
394 the adult fan-shaped body. Genetic studies indicate that interhemispheric glia does play a role  
395 in the morphogenesis of the fan-shaped body, even though this role may be relatively minor, or  
396 occur late in development. Thus, genetic ablation of glia (Spindler et al., 2009), or loss of function of  
397 molecular factors expressed specifically in the interhemispheric ring (Simon et al., 1998; Hitier et al.,  
398 2000), result in defective shapes of the adult FB and EB. However, the pathways of DM1-4 lineages  
399 at the late larval stage did not display major defects.

400 (2) FB pioneers differentiate into the pontine neurons of the adult central complex. Pontine  
401 neurons differ in their projection from all other columnar neurons, because they connect two  
402 columns on either side of the midline. For example, pontine neurons of the right hemispheric DM4  
403 lineage connect the right lateral column of the FB with its left medial column, thereby crossing the  
404 midline. In contrast, axons of other, unicolumnar neurons of the right DM4 remain ipsilaterally,  
405 connecting only to the right lateral column of the FB (see Fig.1). The trajectories of the FB pioneers  
406 reflect this pontine-typical behavior already in the early larva. Thus, the majority of DM4 SU  
407 axons reach the midline and terminate just after crossing it; DM3 axons project slightly further,  
408 followed by DM2 and DM1, which reach more than 20 $\mu$ m into the contralateral hemisphere.  
409 Outgrowing secondary DM1-4 tracts, even though they initially follow the FB pioneers, show their  
410 own characteristic pattern of termination. In particular, secondary axon tracts of DM4 and DM3 do  
411 not cross the midline, but form terminal filopodial tufts in the lateral and medial half, respectively,  
412 of the ipsilateral prFB (see Fig.5).

413 (3) Even though primary FB pioneers and their secondary follower tracts are in close contact  
414 to each other throughout larval development, ablation of the former does not result in gross  
415 structural abnormalities of the latter. Thus, the characteristic trajectories and branching pattern of  
416 the Neurotactin-positive secondary tracts of DM1-4 in the late larva lacking FB pioneers appeared  
417 indistinguishable from the control. Filopodial tufts of secondary tracts in ablated specimens still  
418 assembled into regularly sized globular structures, representing the forerunners of fan-shaped  
419 body columns (see Fig.7B). These findings imply that separate guidance systems act on the early  
420 born pontine neurons and later born unicolumnar neurons. Nothing is known about the molecular  
421 nature of global or local signaling systems controlling the highly ordered architecture of the DM1-4  
422 unicolumnar connections within the central complex. Given that neither ablation of glia, nor loss  
423 of primary FB pioneers, causes major changes in this architecture, at least at the initial phase  
424 of axonal pathfinding, it is likely that local interactions among the different DM1-4 lineages and  
425 sublineages plays a predominant role. For example, local repulsion in between neurons of these  
426 lineages could be instrumental in specifying the separate, largely non-overlapping medio-lateral  
427 domains within the the FB and EB where neurons terminate. Similarly, interactions occurring in  
428 between sequentially born sublineages within a given DM lineage could determine the projection  
429 to different territories along the anterior-posterior axis. It is not yet known how the different  
430 classes of DM neurons distinguished by projection (e.g., PB-FB vs PB-EB vs FB-NO etc) relate to  
431 their pedigree, that is, the time they are born, or the sublineage they belong to. It stands to  
432 reason that the different intermediate progenitors born from the type II DM neuroblasts are  
433 responsible to generate structurally different classes of neurons, but this remains to be confirmed



434 by detailed clonal analysis. If proven correct, one could surmise that intrinsic factors expressed by a  
435 given intermediate progenitor provides its progeny with a specific “projection identity”. Neurons  
436 descended from a hypothetical intermediate progenitor A might recognize a more posterior territory  
437 within the prFB as their proper destination, whereas neurons formed by a (later born) progenitor B  
438 are repelled by the A neurons, and are forced to terminate in more anterior territory. The former  
439 class would develop into PB-FB neurons, the later into PB-EB neurons. That repulsive interactions  
440 in between sublineages are important has been experimentally proven by a recent analysis of  
441 semaphorin signaling in the ellipsoid body (Xie et al., 2017). Here, repulsion among DALv2 R-  
442 neurons, born at different times, is instrumental for the proper central>peripheral projection of  
443 axons within the EB.

444 (4) It is an open question what, if any, role the primary neurons of DM1-4 (both differentiated  
445 neurons and other (non-prFB) SU neurons) play in the adult central complex. It is quite possible  
446 that these neurons do not contribute at all to this structure; in case of another lineage, DALv2,  
447 that has been shown to be the case: secondary DALv2 neurons form the ellipsoid body of the  
448 adult brain, but primary DALv2 neurons arborize in the lateral accessory complex (LAL) and inferior  
449 protocerebrum (IPa) of the larva and adult, but do not become part of the ellipsoid body (Lovick et  
450 al., 2017). The same may be true for the primary neurons of DM1-4. On the other hand, at least a  
451 (small) subset of DM4 definitely will be incorporated into the central complex: the dopaminergic  
452 neurons of the PPM3 cluster, which profusely innervate the central complex and its associated  
453 structures (LAL, BU) have been identified as primary neurons of DM4 (Hartenstein et al., 2017). The  
454 arborization pattern and connectivity of primary DM1-4 neurons (as that of primary neurons in  
455 general) will be worked out in the near future, based on the same serial EM stack that served as  
456 the basis for the current work; however, additional markers that remain continuously expressed in  
457 primary neurons from larval to adult stages will help solving the puzzle of how these neurons are  
458 reorganized during metamorphosis and what fate awaits these neurons in the adult brain.

459 Aside from pioneering the fan-shaped body primordium, SU neurons form part of almost all  
460 lineages of the early larval brain, but we do not yet know what fate awaits these neurons. In  
461 view of the case represented by the FB pioneers, we surmise that other SU neurons also survive  
462 and differentiate during metamorphosis. The axonal projection of SU neurons of a given lineage  
463 prefigures (generally in a rudimentary way) the pathway formed by later born secondary neurons  
464 of that lineage (see Figure 3). Markers similar to the one provided by R45F08-Gal4 are required to  
465 establish what type of adult neurons the different SU neurons give rise to. Of particular interest  
466 are SU neurons of lineages that, like DM1-4, contribute to the adult central complex. In case of  
467 DALv2, which generates all of the R-neurons of the EB, a single SU neuron exists in each hemisphere  
468 (see Table 1). This neuron projects a short axon along the primary tract, but does not reach the EB  
469 primordium described for the late larval stage in previous works (Lovick et al., 2016; 2017). Two  
470 other lineages, DALcl1 and DALcl2, contribute a large number of secondary neurons to the anterior  
471 visual pathway, which provides input to the central complex (Omoto et al., 2017). Both lineages are  
472 composed of two hemilineages, DALcl1/2d (dorsal) and DALcl1/2v (ventral). DALcl1/2d differentiate  
473 into small neurons whose proximal dendrites innervate the anterior optic tubercle, and distal axons  
474 the bulb, where they target the dendrites of DALv2 neurons (Omoto et al., 2017; Lovick et al., 2017).  
475 DALcl1/2 form a relatively large number of SU neurons which for the most part follow the dorsal  
476 pathway, suggesting that they belong to the DALcl1/2d hemilineage. As outlined above, secondary  
477 neurons of DALcl1/2 innervate the anterior optic tubercle and the bulb of the adult brain. Do the  
478 earlier born primary SU neurons form early larval primordia of these compartments, analogous to  
479 the prFB established by SU neurons of DM1-4. Most DALcl1/2 SU neurons extend relatively short  
480 axons that follow the differentiated DALcl1/2d neurons, cross the peduncle of the mushroom body,  
481 and terminate shortly thereafter. A few other DALcl1/2 SU neurons project further, but terminate  
482 at different locations along the primary tract. In other words, a spatially restricted territory that  
483 houses all DALcl1/2d SU terminations, and that might therefore be considered a forerunner of the  
484 bulb, does not exist in the early larva. Similarly, no projections of SU neurons are concentrated in a

485 region that might correspond to the primordium of the anterior optic tubercle. In conclusion, SU  
486 neurons of lineages DM1-4 may represent a rare case where primary neurons establish a blueprint  
487 for an adult-specific brain compartment.

## 488 **Methods and Materials**

### 489 ***Drosophila* Stocks**

490 The following *Drosophila* lines were acquired from the Bloomington *Drosophila* Stock Center (BDSC),  
491 followed by citation and stock number in parentheses when applicable: R45F08-Gal4 (Jenett et al.,  
492 2012; #49565), 10xUAS-mCD8::GFP (Pfeiffer et al., 2010; #32186), R57C10-Flp-2::PEST,su(Hw)attP8::HA\_V5\_FLAG  
493 (Nern et al., 2015; #64089), UAS-hid UAS-rpr UAS-lacZ (Zhou et al., 1997), Sco/CyO; tub-Gal80ts  
494 (Bloomington #7018). Drl-tau::lacZ (Chen and Hing, 2008), was kindly provided by H. Hing, The  
495 College at Brockport, State University of New York, New York.

### 496 **Selective ablation of fan-shaped body pioneers**

497 FB pioneers were ablated from late first instar to second instar. The ablation experiment was carried  
498 out using the following genotype: UAS-hid UAS-rpr UAS-lacZ/+;10xUAS-mCD8::GFP/+; R45F08-  
499 Gal4/tub-Gal80ts. Freshly hatched larvae were collected and kept at 18°C degrees for two days  
500 (corresponding to 24 hours at 25 °C). Subsequently, these late first instar/early second instar larvae  
501 were transferred to 29°C for 24 hours. After the temperature shift, larvae were transferred back to  
502 18 °C. When reaching the third instar wandering stage, late larvae were collected, dissected and  
503 processed for analysis. The constitutive activation of UAS-hid,rpr by R45F08-Gal4 is lethal, and  
504 only survives into larval stages with Gal80-mediated suppression. Control flies were either males  
505 lacking UAS-hid UAS-rpr UAS-lacZ and tub-Gal80ts (Fig.7A-C), or females lacking a temperature shift  
506 and maintained at 18 degrees, which were completely viable (data not shown). Most experimental  
507 female larvae (heat-shifted) exhibited lethality; a small fraction were slowed in their development  
508 relative to male controls, and this was the cohort utilized for analysis.

### 509 **Single cell clones**

510 Single-cell analysis of the differentiated SU neurons in the adult was conducted using the multicolor  
511 flip-out (MCFO) method described previously (Nern et al., 2015). Flies of the genotype R57C10-Flp-  
512 2::PEST,su(Hw)attP8::HA\_V5\_FLAG\_1 were crossed to R45F08-Gal4 to generate the required progeny.  
513 The cross was kept at 25°C under normal light/dark cycle. 1-3 day adults were dissected, stained  
514 and imaged to screen for single-cell labeling of R45F08-Gal4-positive pontine neurons.

### 515 **Immunohistochemistry**

516 Antibodies: The following primary antibodies were obtained from Developmental Studies Hy-  
517 bridoma Bank, DHSB, (Iowa City, IA): rat anti-DN-cadherin (DN-EX #8, adult, third instar larva: 1:8,  
518 first instar larva: 1:10), mouse anti-Brp (nc82,1:20), mouse anti-Neurotactin (BP106, 1: 6) mouse anti-  
519 Neuroglian (BP104, Adult: 1:12, first instar larva: 1:14), mouse anti-repo (1:10), rabbit anti-βGal (1:3)  
520 . We also used rabbit anti-HA (1:300, Cell Signaling Technologies), chicken anti-GFP (1:1000, Abcam)  
521 and rat anti-FLAG (1:300, Novus Biologicals). The following secondary antibodies were obtained  
522 from Jackson ImmunoResearch; Molecular Probes) and used: Alexa 568-conjugated anti-mouse  
523 (1:500), cy5-conjugated anti-mouse (1:300), cy3-conjugated anti-rat (1:300), Alexa 488- conjugated  
524 anti-rabbit (1:1000), cy5-conjugated anti-rat (1:300), cy3-conjugated anti-rabbit (1:160), and Alexa  
525 488-conjugated anti-rabbit (1:300). We also obtained Alexa 488-conjugated anti-chicken (1:1000)  
526 from Thermo Fisher Scientific.

527 Adult brain preparation: Brain samples were dissected in phosphate buffered saline (1X PBS, pH  
528 7.4) for 30 minutes. The dissected brains were then fixed in ice-cold 4% formaldehyde fixing solution  
529 [750μl phosphate buffered saline (PBS); 250μl 16% paraformaldehyde, EM grade (Sigma)] for 2.5  
530 hours before washing four times, 15 minutes each, with ice-cold 1X PBS. Then the brains were

531 dehydrated in a series of ice-cold ethanol diluted with 1X PBS (5,10,20, 50, 70 and 100% ethanol; for  
532 5 minutes at each concentration). After hydrating, the brains were stored in 100% ethanol at -20 °C  
533 overnight. For rehydration, we repeated the hydration process in reverse order. These rehydrated  
534 brains then were washed with ice-cold 1X PBS 4 times, 15 minutes each. Next, they were washed  
535 3 times, 15 minutes each, with ice-cold 0.3% PBT (PBS; 0.3% Triton X-100, pH7.4), followed by 4  
536 washes, 15 minutes each, on the nutator at room temperature. After washing samples were blocked  
537 (10% normal goat serum in 0.3% PBT) and then stained with primary and secondary antibodies  
538 for 3 days each under gentle shaking on the nutator at 4 °C. Washes were done when replacing  
539 primary with secondary antibodies with 0.3% PBT, and when removing secondary antibodies. Finally  
540 samples were transferred to Vectashield, mounted and imaged. Brains with MCFO single cell clones  
541 were processed following a shortened protocol in which the dehydration/rehydration steps were  
542 omitted.

543 Larval brain preparation: Larval brains were dissected at the indicated age (24, 48, 60, 72 and  
544 96 hours old) in phosphate buffered saline (1X PBS, pH 7.4) for 30 minutes and then fixed in 4%  
545 formaldehyde fixing solution ( 900  $\mu$ l 1X PBS, 100  $\mu$ l 37% paraformaldehyde) for 30 minutes with  
546 gentle shaking. The fixed brains then were washed with the indicated buffer solution 4 times, 15  
547 minutes each. Brains were also subjected to the methanol dehydration series diluted with 1X PBS  
548 (10 minutes in 25% and 50% methanol each, and 4x 1-minute washes in 75% methanol, and one  
549 5-minute wash in 100% methanol). Samples were then stored in 100% methanol at -20 °C overnight,  
550 then rehydrated the next day by washing with 1X PBS once. Subsequently samples were washed  
551 with 0.1% PBT (PBS 0.1% Triton X-100, pH7.4) on the nutator. After washing, samples were blocked  
552 (10% normal goat serum in 0.1% PBT for 30 minutes), and incubated in primary and secondary  
553 antibodies for 2 days each at 4°C while gently shaking on the nutator. Washes with 0.1% PBT  
554 were done when replacing primary with secondary antibody and before placing the samples in  
555 VectaShield.

### 556 **Digital reconstruction and analysis of SU neurons from serial EM**

557 SU neurons were reconstructed from a series of TEM sections of an entire nervous system of a  
558 6 hour old larva as described in Ohyama et al. (2015). Sections were imaged semi-automatically  
559 using the Leginon software (Suloway et al., 2005) and assembled using the TrakEM2 (Cardona et  
560 al., 2012). Reconstruction utilized CATMAID, a web-based software developed (Saalfeld et al., 2009)  
561 with updated neuronal skeletization and analytic tools (Schneider-Mizell et al., 2016).Reconstructed  
562 using the method described in Ohyama et al., (2015); Schneider-Mizell et al. (2016). For obtaining  
563 the area of the nucleus and cytoplasm of a cell, a section at or near the center of the soma was  
564 chosen. Subsequently, the length of the longest and shortest radius was obtained by using a tool of  
565 CATMAID this gives the radius in nm. The average radius was taken to calculate area.

566 **Table 1**

**Table 1.** Tabular representation of all SU neurons of the first instar (L1) larval brain ordered by lineages (see also supplementary Figures S2-S9 for graphic representation). SU neurons of a given lineage are clustered in a cohesive tract, the primary axon tract. These tracts provide useful landmarks for the ongoing analyses of the L1 brain circuitry using the CATMAID L1 serial TEM dataset. Column to the left lists names of lineages or lineage pairs/small lineage groups (see Hartenstein et al., 2015). Columns 2 and 6 give numbers of SU neurons associated with corresponding lineages of the right hemisphere and left hemisphere, respectively. Columns 3-5 and 7-9 show the coordinates of the neuropil entry points of the SU-defined primary axon tracts for the right hemisphere and left hemisphere, respectively. The origin ( $z=0/x=0/y=0$ ) represents the anterior/right/dorsal corner of the virtual cuboid that encloses the data set. The units for  $z$  is section number ( $z=0$  corresponding to most anterior section; section thickness = 45nm);  $x$  and  $y$  indicate pixels, with each pixel corresponding to approximately 3.8nm. The two columns to the right show how SU neuron populations are currently annotated in the CATMAID data stack..

| Name       | SU Right | X     | Y     | Z    | SU Left | X     | Y     | Z    | Annotation in CATMAID data set |        |
|------------|----------|-------|-------|------|---------|-------|-------|------|--------------------------------|--------|
| BAla1/2    | 1        | 7000  | 16804 | 613  | 2       | 20785 | 17335 | 650  | BAla12 s                       | BAla s |
| BAla3/4    | 6        | 6730  | 17070 | 595  | 6       | 21018 | 17547 | 608  | BAla34 s                       | BAla s |
| BAlc       | 8        | 6118  | 15550 | 710  | 6       | 21943 | 16465 | 763  | BAlc post s                    | BAlc s |
|            | 0        | 6436  | 16028 | 730  | 0       | 22074 | 16721 | 745  | BAlc ant                       |        |
| BAlp1      | 4        | 6775  | 14290 | 934  | 2       | 21503 | 15632 | 910  | BAlp post s                    | BAlp s |
| BAlp int s | 0        | 6484  | 14472 | 871  | 6       | 21754 | 15571 | 961  | BAlp int s                     | BAlp s |
| BAlp2/3    | 8        | 6484  | 14472 | 871  | 8       | 21415 | 16268 | 919  | BAlp ant s                     | BAlp s |
| BAlp4      | 1        | 6924  | 15416 | 887  | 2       | 6924  | 15416 | 912  | BAlp4 s                        | BAlp s |
| BAlv       | 2        | 7825  | 17133 | 945  | 2       | 20849 | 18457 | 900  | BAlv s                         |        |
| TRdl       | 7        | 7692  | 16811 | 945  | 8       | 20803 | 18119 | 900  | TRAlv s                        |        |
| BAmas1/2d  | 2        | 7804  | 16830 | 450  | 3       | 20100 | 16788 | 485  | BAmas12 dor s                  | BAm s  |
| BAmas1/2v  | 5        | 8042  | 17535 | 520  | 5       | 19469 | 17806 | 583  | BAmas12 ven s                  | BAm s  |
| BAm1d      | 3        | 7982  | 9098  | 385  | 4       | 19704 | 10647 | 575  | BAm1 d s                       | BAm s  |
| BAm1v      | 3        | 8830  | 10619 | 408  | 4       | 19531 | 11770 | 608  | BAm1 v s                       | BAm s  |
| BAm2d      | 1        | 9058  | 10370 | 433  | 1       | 18443 | 11778 | 585  | BAm2 d s                       | BAm s  |
| BAm2       | 8        | 8952  | 11125 | 476  | 8       | 18361 | 11940 | 585  | BAm2 v s                       | BAm s  |
| BAmv1/2    | 2        | 8974  | 13923 | 620  | 3       | 18681 | 14391 | 715  | BAmv12 ven s                   | BAm s  |
|            | 9        | 9228  | 13510 | 620  | 9       | 18421 | 13797 | 710  | BAmv12 dor s                   | BAm s  |
|            | 6        | 8869  | 13782 | 620  | 7       | 18432 | 14113 | 715  | BAmv12 int s                   | BAm s  |
| BAmv3      | 0        | 7699  | 13913 | 563  | 0       | 20124 | 13814 | 602  | BAmv3 s                        | BAm s  |
| DALcl1/2   | 11       | 6360  | 9495  | 497  | 11      | 22257 | 10078 | 640  | DALcl12 d s                    | DAL s  |
|            | 2        | 6227  | 9851  | 509  | 3       | 22257 | 10078 | 640  | DALcl12 v s                    | DAL s  |
|            | 0        | 6227  | 9851  | 509  | 0       | 22257 | 10078 | 640  | DALcl12 v d s                  |        |
| DALcm1/2   | 2        | 7657  | 8507  | 396  | 5       | 21149 | 8819  | 588  | DALcm12 v s                    | DAL s  |
|            | 7        | 7291  | 8242  | 400  | 7       | 22134 | 8100  | 590  | DALcm12 v s                    | DAL s  |
| DALd       | 8        | 6502  | 7878  | 485  | 8       | 22168 | 8666  | 717  | DALd s                         | DAL s  |
| DALl1      | 7        | 5526  | 9990  | 700  | 5       | 22484 | 10719 | 835  | DALl1 s                        | DAL s  |
| DALv2/3    | 1        | 5683  | 11955 | 640  | 1       | 23431 | 12876 | 785  | DALv23 s                       | DAL s  |
| DAMd1      | 1        | 9873  | 6742  | 314  | 1       | 18613 | 8195  | 492  | DAMd1 s                        | DAM s  |
| DAMd2/3    | 3        | 9186  | 7590  | 320  | 3       | 19152 | 7612  | 515  | DAMd23 s                       | DAM s  |
| DAMv1/2    | 0        | 10456 | 8259  | 330  | 0       | 17956 | 9202  | 483  | DAMv12 s                       | DAM s  |
| DPLal1-3   | 4        | 3797  | 7930  | 726  | 4       | 24177 | 8786  | 928  | DPLal1-3 s                     | DPL s  |
| DPLam      | 1        | 5295  | 7012  | 648  | 1       | 23529 | 7621  | 900  | DPLam s                        | DPL s  |
| DPLc1/3    | 6        | 6317  | 4922  | 701  | 6       | 21967 | 5554  | 910  | DPLc ant lat s                 | DPL s  |
| DPLcx      | 0        | 6555  | 4072  | 762  | 0       | 21560 | 5232  | 1021 | DPLc post int                  | DPL s  |
| DPLc4      | 7        | 5083  | 5116  | 804  | 6       | 23114 | 5504  | 1051 | DPLc post lat s                | DPL s  |
| DPLc2      | 5        | 5587  | 5556  | 737  | 4       | 23114 | 5504  | 1051 | DPLc post lat ant s            | DPL s  |
| DPLc5      | 4        | 8233  | 4311  | 800  | 5       | 18946 | 4916  | 1147 | DPLc5 s                        | DPL s  |
| DPLd       | 7        | 6124  | 6302  | 555  | 6       | 22521 | 6743  | 814  | DPLd s                         | DPL s  |
| DPLl1-3    | 2        | 4618  | 5228  | 1002 | 4       | 23169 | 6640  | 1155 | DPLl p s                       | DPL s  |
|            | 3        | 4618  | 5228  | 1002 | 2       | 22753 | 6172  | 1152 | DPLl i s                       | DPL s  |
|            | 1        | 4618  | 5228  | 1002 | 0       | 22753 | 6172  | 1152 | DPLl a s                       | DPL s  |
| DPLm1/2    | 1        | 6701  | 3490  | 890  | 1       | 21415 | 4821  | 1122 | DPLm1 s                        | DPL s  |
|            | 0        | 6067  | 3530  | 887  | 1       | 21601 | 4188  | 1157 | DPLm2 s                        | DPL s  |

**Table 1 continued from previous page**

| Name      | SU Right | X     | Y     | Z    | SU Left | X     | Y     | Z    | Annotation in CATMAID data set |         |
|-----------|----------|-------|-------|------|---------|-------|-------|------|--------------------------------|---------|
| DPLp1/2   | 0        | 4754  | 5826  | 1078 | 0       | 22663 | 7023  | 1253 | DPLp                           | DPL s   |
| DPM11/2 a | 7        | 10537 | 5137  | 721  | 8       | 17915 | 5877  | 885  | DPM112 ant s                   | DPM s   |
| DPM11/2 p | 7        | 9494  | 4534  | 762  | 5       | 19325 | 5205  | 920  | DPM112 pos s                   | DPM s   |
| DPM13/4 a | 3        | 6840  | 4923  | 535  | 3       | 22049 | 5853  | 813  | DPM134 ant s                   | DPM s   |
| DPM13/4 p | 2        | 8306  | 4546  | 584  | 2       | 19359 | 4108  | 888  | DPM134 pos s                   | DPM s   |
| DPMI x    | 4        | 9039  | 4931  | 855  | 4       | 18560 | 5575  | 1043 | DPLc post med s                | DPMI x  |
| DPMm1     | 7        | 11942 | 5955  | 440  | 7       | 16763 | 6151  | 642  | DPMm1 ppFB s                   | DPM s   |
|           | 2        | 11942 | 5955  | 440  | 2       | 18275 | 6052  | 610  | DPMm1 ant comm s               | DPM s   |
|           | 2        | 11942 | 5955  | 440  | 2       | 16763 | 6151  | 642  | DPMm1 desc s                   | DPM s   |
|           | 5        | 11942 | 5955  | 440  | 5       | 16464 | 6708  | 755  | DPMm1 upp comm s               | DPM s   |
| DPMm2     | 2        | 10168 | 4844  | 507  | 2       | 17750 | 5503  | 818  | DPMm2 ppFB ant dor s           | DPM s   |
| DPMpl1/2  | 2        | 10277 | 5107  | 760  | 2       | 16825 | 6773  | 1022 | DPMpl12 s                      | DPM s   |
| DPMpl3    | 3        | 10447 | 5809  | 900  | 3       | 17203 | 6839  | 1045 | DPMpl3 s                       | DPM s   |
| DPMpm1    | 7        | 11076 | 5406  | 652  | 7       | 16988 | 6386  | 850  | DPMpm1 ppFB s                  | DPM s   |
|           | 5        | 11076 | 5406  | 652  | 6       | 16988 | 6386  | 850  | DPMpm1 s large nuc             | DPM s   |
| DPMpm2    | 5        | 11002 | 4795  | 764  | 4       | 16457 | 6901  | 1034 | DPMpm2 ppFB                    | DPM s   |
|           | 3        | 11002 | 4795  | 764  | 3       | 16457 | 6901  | 1034 | DPMpm2 s                       | DPM s   |
|           | 3        | 11002 | 4795  | 764  | 4       | 16457 | 6901  | 1034 | DPMpm2 loSM                    | DPM s   |
| CM1/3     | 5        | 10099 | 7189  | 1058 | 5       | 16991 | 8713  | 1160 | CM13 lat s                     | CM s    |
|           | 10       | 10099 | 7189  | 1058 | 9       | 16991 | 8713  | 1160 | CM13 med s                     | CM s    |
| CM4       | 9        | 11263 | 6762  | 914  | 8       | 16254 | 7674  | 1049 | CM4 ppFB s                     | CM s    |
|           | 4        | 10688 | 6684  | 914  | 4       | 16976 | 8016  | 1049 | CM4 s GC                       | CM s    |
|           | 4        | 10966 | 6516  | 914  | 4       | 16090 | 7354  | 1049 | CM4 s short pos                | CM s    |
|           | 6        | 10924 | 6129  | 914  | 6       | 16728 | 7732  | 1049 | CM4 s MEFcom                   | CM s    |
|           | 6        | 11644 | 6530  | 914  | 6       | 16778 | 7855  | 1049 | CM4 s dor pos MEF              | CM s    |
|           | 11       | 11075 | 5868  | 914  | 7       | 16299 | 8508  | 1049 | CM4 s loSM                     | CM s    |
|           | 7        | 11567 | 6648  | 914  | 5       | 16373 | 7396  | 1049 | CM4 s ven                      | CM s    |
|           | 4        | 10900 | 6706  | 914  | 4       | 16730 | 7890  | 1049 | CM4 s dor pos com              | CM s    |
| CP1d      | 2        | 7716  | 6542  | 1113 | 2       | 19180 | 8263  | 1219 | CP1 d s                        | CP s    |
|           | 4        | 7716  | 6542  | 1113 | 4       | 19316 | 7774  | 1250 | CPd s                          | CP s    |
| CP1v      | 5        | 8181  | 7464  | 1091 | 7       | 19554 | 9189  | 1237 | CPf s                          | CP s    |
| CP2/3d    | 5        | 7077  | 6698  | 1123 | 5       | 20186 | 8171  | 1272 | CPb s                          | CP s    |
| CP2/3v    | 8        | 6554  | 7778  | 1164 | 5       | 20585 | 9214  | 1277 | CP23 v s                       | CP s    |
|           | 1        | 6554  | 7778  | 1164 | 1       | 20585 | 9214  | 1277 | CP23 ppFB s                    | CP s    |
|           | 2        | 6681  | 6747  | 1266 | 2       | 19744 | 8199  | 1284 | CPa s                          | CP s    |
|           | 2        | 7425  | 7962  | 1309 | 1       | 19694 | 8890  | 1274 | CPc s                          | CP s    |
| CP4       | 2        | 7563  | 6235  | 1112 | 2       | 19281 | 7842  | 1249 | CPe s                          | CP s    |
| BLAd      | 2        | 3299  | 8621  | 924  | 2       | 25497 | 9834  | 1112 | BLAd ven lat s                 | BLA s   |
|           | 0        | 3735  | 8156  | 821  | 0       | 24535 | 8852  | 1086 | BLAd dor med                   | BLA s   |
|           | 0        | 3592  | 9182  | 817  | 0       | 24788 | 9785  | 1130 | BLAd ven med                   |         |
| BLAI      | 4        | 4142  | 8909  | 753  | 5       | 24189 | 9798  | 891  | BLAI s                         | BLA s   |
| BLAv1/2 a | 2        | 3248  | 9642  | 935  | 2       | 25117 | 10786 | 1087 | BLAv12 ant s                   | BLA s   |
| BLAv12 p  | 3        | 3084  | 10906 | 1022 | 4       | 24681 | 10726 | 1152 | BLAv12 pos s                   | BLA s   |
|           | 0        | 3580  | 9722  | 939  | 1       | 24681 | 10726 | 1152 | BLAv12 lat s                   | BLA s   |
| BLAvm     | 5        | 3273  | 11807 | 968  | 5       | 24797 | 11929 | 1026 | BLAvm ant s                    | BLA s   |
|           | 0        | 3587  | 11334 | 985  | 0       | 24896 | 13107 | 1118 | BLAvm pos                      |         |
| BLAd1     | 5        | 4148  | 9595  | 1211 | 5       | 24024 | 11541 | 1282 | BLAd OL s                      | BLD 1   |
| BLD2-4    | 5        | 3786  | 7250  | 1020 | 6       | 23907 | 8709  | 1147 | BLDc s                         | BLD 2-4 |
| BLD5/6    | 4        | 4118  | 7249  | 1002 | 5       | 23952 | 8397  | 1146 | BLDd s                         | BLD 5-6 |
| BLP1/2    | 10       | 4766  | 8710  | 1277 | 9       | 23018 | 10439 | 1330 | BLP12 a s                      | BLP s   |
|           | 5        | 4811  | 8307  | 1259 | 5       | 22093 | 9855  | 1311 | BLP12 b s                      | BLP s   |
| BLP3/4    | 9        | 5311  | 9124  | 1276 | 6       | 21440 | 10659 | 1304 | BLP34 a s                      | BLP s   |
|           | 8        | 5631  | 9360  | 1280 | 8       | 21751 | 10642 | 1325 | BLP34 b s                      | BLP s   |
| BLVa1/2   | 1        | 5945  | 9521  | 1216 | 2       | 21962 | 11184 | 1299 | BLVa12 a s                     | BLVa s  |
|           | 2        | 6121  | 9469  | 1216 | 1       | 22720 | 11881 | 1327 | BLVa12 b s                     | BLVa s  |
|           | 4        | 4996  | 11104 | 1142 | 4       | 23409 | 13236 | 1214 | BLVa t s                       | BLVa s  |
| BLVa3/4 a | 3        | 5544  | 10436 | 1197 | 4       | 22697 | 12751 | 1229 | BLVa34 a s                     | BLVa s  |

**Table 1 continued from previous page**

| Name  | SU Right | X    | Y     | Z    | SU Left | X     | Y     | Z    | Annotation in CATMAID data set |        |
|-------|----------|------|-------|------|---------|-------|-------|------|--------------------------------|--------|
|       | 1        | 5527 | 10548 | 1172 | 1       | 22358 | 12498 | 1235 | BLVa34 b s                     | BLVa s |
| BLVp1 | 0        | 7201 | 9214  | 1193 | 0       | 20283 | 10872 | 1248 |                                |        |
| BLVp2 | 7        | 7031 | 9119  | 1178 | 6       | 20704 | 10758 | 1248 | BLVp2 s                        | BLV s  |
|       |          |      |       |      |         |       |       |      |                                |        |
| TOTAL | 405      |      |       |      | 407     |       |       |      |                                |        |

<sup>567</sup> **Acknowledgments**

<sup>568</sup> We thank Akira Fushiki, Ivan Larderet, Feng Li, Avinash Khandelwal, Timo Saumweber, Jennifer Lovick, Larisa  
<sup>569</sup> Meier, Katharina Eichler, Javier Valdez-Aleman, Simon Sprecher and Philipp Schlegel for their contributions in  
<sup>570</sup> the reconstruction 17.2% of SU neurons.

## References

- 571  
572 **A OT**, Zuker CS, Reiser MB. Visual place learning in *Drosophila melanogaster*. *Nature*. 2011; 474:204–207.  
573 <http://dx.doi.org/10.1038/nature10131>, doi: 10.1038/nature10131.
- 574 **Bate M**. The mesoderm and its derivatives. In: Martinez-Arias A, editor. *Bate M* Plainview: The development of  
575 *Drosophila melanogaster*. Cold Spring Harbor Laboratory Press; 1993.p. 941–1012.
- 576 **Bello BC**, Izergina N, Caussinus E, Reichert H. Amplification of neural stem cell proliferation by intermediate  
577 progenitor cells in *Drosophila* brain development. *Neural Development*. 2008 Feb; 3(1):5. <https://doi.org/10.1186/1749-8104-3-5>, doi: 10.1186/1749-8104-3-5.
- 579 **Bender JA**, Pollack AJ, Ritzmann RE. Neural Activity in the Central Complex of the Insect Brain Is Linked to  
580 Locomotor Changes. *Current Biology*. 2010; 20(10):921–926. <http://dx.doi.org/10.1016/j.cub.2010.03.054>, doi:  
581 [10.1016/j.cub.2010.03.054](https://doi.org/10.1016/j.cub.2010.03.054).
- 582 **Bentley D**, Toroian-Raymond A. Embryonic and postembryonic morphogenesis of a grasshopper interneuron.  
583 *Journal of Comparative Neurology*. 1981; 201(4):507–518. <https://onlinelibrary.wiley.com/doi/abs/10.1002/cne.902010404>, doi: [10.1002/cne.902010404](https://doi.org/10.1002/cne.902010404).
- 585 **Berck ME**, Khandelwal A, Claus L, Hernandez-Nunez L, Si G, Tabone CJ, Li F, Truman JW, Fetter RD, Louis M,  
586 Samuel AD, Cardona A. The wiring diagram of a glomerular olfactory system. *eLife*. 2016 may; 5:e14859.  
587 <https://doi.org/10.7554/eLife.14859>, doi: [10.7554/eLife.14859](https://doi.org/10.7554/eLife.14859).
- 588 **Boyan GS**, Reichert H. Mechanisms for complexity in the brain: generating the insect central com-  
589 plex. *Trends in Neurosciences*. 2011; 34(5):247–257. <http://dx.doi.org/10.1016/j.tins.2011.02.002>, doi:  
590 [10.1016/j.tins.2011.02.002](https://doi.org/10.1016/j.tins.2011.02.002).
- 591 **Boyan GS**, Liu Y, Khalsa SK, Hartenstein V. A conserved plan for wiring up the fan-shaped body in the grasshopper  
592 and *Drosophila*. *Development Genes and Evolution*. 2017; 227:253–269.
- 593 **Brody T**, Odenwald WF. Regulation of temporal identities during *Drosophila* neuroblast lineage develop-  
594 ment. *Current Opinion in Cell Biology*. 2005; 17(6):672–675. <https://doi.org/10.1016/j.ceb.2005.09.013>, doi:  
595 [10.1016/j.ceb.2005.09.013](https://doi.org/10.1016/j.ceb.2005.09.013).
- 596 **Brown HLD**, Cherbas L, Cherbas P, Truman JW. Use of time-lapse imaging and dominant negative receptors to  
597 dissect the steroid receptor control of neuronal remodeling in *Drosophila*. *Development*. 2006; 133(2):275–285.  
598 <http://dev.biologists.org/content/133/2/275>, doi: [10.1242/dev.02191](https://doi.org/10.1242/dev.02191).
- 599 **Brown HLD**, Truman JW. Fine-tuning of secondary arbor development: the effects of the ecdysone receptor  
600 on the adult neuronal lineages of the *Drosophila* thoracic CNS. *Development*. 2009; 136(19):3247–3256.  
601 <http://dev.biologists.org/content/136/19/3247>, doi: [10.1242/dev.039859](https://doi.org/10.1242/dev.039859).
- 602 **Cardona A**, Saalfeld S, Schindelin J, Arganda-Carreras I, Preibisch S, Longair M, Tomancak P, Hartenstein V,  
603 Douglas RJ. TrakEM2 Software for Neural Circuit Reconstruction. *PLOS ONE*. 2012 06; 7(6):1–8. <https://doi.org/10.1371/journal.pone.0038011>, doi: [10.1371/journal.pone.0038011](https://doi.org/10.1371/journal.pone.0038011).
- 605 **Chen W**, Hing H. The L1-CAM, Neuroglian, functions in glial cells for *Drosophila* antennal lobe development.  
606 *Developmental Neurobiology*. 2008; 68(8):1029–1045. <https://onlinelibrary.wiley.com/doi/abs/10.1002/dneu.20644>, doi: [10.1002/dneu.20644](https://doi.org/10.1002/dneu.20644).
- 608 **Cicero S**, Herrup K. Cyclin-Dependent Kinase 5 Is Essential for Neuronal Cell Cycle Arrest and Differentia-  
609 tion. *Journal of Neuroscience*. 2005; 25(42):9658–9668. <http://www.jneurosci.org/content/25/42/9658>, doi:  
610 [10.1523/JNEUROSCI.1773-05.2005](https://doi.org/10.1523/JNEUROSCI.1773-05.2005).
- 611 **Dumstreit K**, Wang F, Nassif C, Hartenstein V. Early development of the *Drosophila* brain: V. Pattern of postem-  
612 bryonic neuronal lineages expressing DE-cadherin. *Journal of Comparative Neurology*. 2002; 455(4):451–462.  
613 <https://onlinelibrary.wiley.com/doi/abs/10.1002/cne.10484>, doi: [10.1002/cne.10484](https://doi.org/10.1002/cne.10484).
- 614 **Eckenhoff MF**, Rakic P. Radial organization of the hippocampal dentate gyrus: A Golgi, ultrastructural, and  
615 immunocytochemical analysis in the developing rhesus monkey. *Journal of Comparative Neurology*. 1984;  
616 223(1):1–21. <https://onlinelibrary.wiley.com/doi/abs/10.1002/cne.902230102>, doi: [10.1002/cne.902230102](https://doi.org/10.1002/cne.902230102).
- 617 **Eichler K**, Li F, Litwin-Kumar A, Park Y, Andrade I, Schneider-Mizell CM, Saumweber T, Huser A, Eschbach  
618 C, Gerber B, Fetter RD, Truman JW, Priebe CE, Abbott LF, Thum AS, Zlatić M, Cardona A. The complete  
619 connectome of a learning and memory centre in an insect brain. *Nature*. 2017; 548(7666):175–182. <http://dx.doi.org/10.1038/nature23455>, doi: [10.1038/nature23455](https://doi.org/10.1038/nature23455).
- 620

- 621 **Green J**, Adachi A, Shah KK, Hirokawa JD, Magani PS, Maimon G. A neural circuit architecture for angular  
622 integration in *Drosophila*. *Nature*. 2017; 546(7656):101–106. <http://dx.doi.org/10.1038/nature22343>, doi:  
623 10.1038/nature22343.
- 624 **Hanesch U**, Fischbach KF, Heisenberg M. Neuronal architecture of the central complex in *Drosophila*  
625 *melanogaster*. *Cell and Tissue Research*. 1989 Jan; 257(2):343–366. <https://doi.org/10.1007/BF00261838>, doi:  
626 10.1007/BF00261838.
- 627 **Hartenstein V**, Cruz L, Lovick J, Guo M. Developmental analysis of the dopamine-containing neurons of the  
628 *Drosophila* brain. *Journal of Comparative Neurology*. 2016 06; 525. doi: [10.1002/cne.24069](https://doi.org/10.1002/cne.24069).
- 629 **Hartenstein V**, Younossi-Hartenstein A, Lovick JK, Kong A, Omoto JJ, Ngo KT, Viktorin G. Lineage-  
630 associated tracts defining the anatomy of the *Drosophila* first instar larval brain. *Developmental Bi-*  
631 *ology*. 2015; 406(1):14 – 39. <http://www.sciencedirect.com/science/article/pii/S0012160615300270>, doi:  
632 <https://doi.org/10.1016/j.ydbio.2015.06.021>.
- 633 **Hitier R**, Simon AF, Savarit F, Pr eat T. no-bridge and linotte act jointly at the interhemispheric junction to build  
634 up the adult central brain of *Drosophila melanogaster*. *Mechanisms of Development*. 2000; 99(1):93 – 100.  
635 <http://www.sciencedirect.com/science/article/pii/S0925477300004834>, doi: [https://doi.org/10.1016/S0925-](https://doi.org/10.1016/S0925-4773(00)00483-4)  
636 [4773\(00\)00483-4](https://doi.org/10.1016/S0925-4773(00)00483-4).
- 637 **Ito K**, Awasaki T. 8. In: Technau GM, editor. *Clonal Unit Architecture of the Adult Fly Brain* New York, NY: Springer  
638 New York; 2008. p. 137–158. [https://doi.org/10.1007/978-0-387-78261-4\\_9](https://doi.org/10.1007/978-0-387-78261-4_9), doi: 10.1007/978-0-387-78261-  
639 4\_9.
- 640 **Ito M**, Masuda N, Shinomiya K, Endo K, Ito K. Systematic Analysis of Neural Projections Reveals Clonal Composi-  
641 tion of the *Drosophila* Brain. *Current Biology*. 2013; 23(8):644–655. <http://dx.doi.org/10.1016/j.cub.2013.03.015>,  
642 doi: [10.1016/j.cub.2013.03.015](https://doi.org/10.1016/j.cub.2013.03.015).
- 643 **Jenett A**, Rubin G, Ngo T, Shepherd D, Murphy C, Dionne H, Pfeiffer B, Cavallaro A, Hall D, Jeter J, Iyer N, Fetter D,  
644 Hausenfluck J, Peng H, Trautman E, Svirskas R, Myers E, Iwinski Z, Aso Y, DePasquale G, et al. A GAL4-Driver  
645 Line Resource for *Drosophila* Neurobiology. *Cell Reports*. 2012; 2(4):991–1001. [https://doi.org/10.1016/j.](https://doi.org/10.1016/j.celrep.2012.09.011)  
646 [celrep.2012.09.011](https://doi.org/10.1016/j.celrep.2012.09.011), doi: [10.1016/j.celrep.2012.09.011](https://doi.org/10.1016/j.celrep.2012.09.011).
- 647 **el Jundi B**, Pfeiffer K, Heinze S, Homberg U. Integration of polarization and chromatic cues in the insect  
648 sky compass. *Journal of Comparative Physiology A*. 2014 Jun; 200(6):575–589. [https://doi.org/10.1007/](https://doi.org/10.1007/s00359-014-0890-6)  
649 [s00359-014-0890-6](https://doi.org/10.1007/s00359-014-0890-6), doi: 10.1007/s00359-014-0890-6.
- 650 **Kahsai L**, Martin JR, Winther ÅME. Neuropeptides in the *Drosophila* central complex in modulation of locomotor  
651 behavior. *Journal of Experimental Biology*. 2010; 213(13):2256–2265. [http://jeb.biologists.org/content/213/](http://jeb.biologists.org/content/213/13/2256)  
652 [13/2256](http://jeb.biologists.org/content/213/13/2256), doi: [10.1242/jeb.043190](https://doi.org/10.1242/jeb.043190).
- 653 **Kawauchi T**, Shikanai M, Kosodo Y. Extra-cell cycle regulatory functions of cyclin-dependent kinases (CDK) and  
654 CDK inhibitor proteins contribute to brain development and neurological disorders. *Genes to Cells*. 2013;  
655 18(3):176–194. <https://onlinelibrary.wiley.com/doi/abs/10.1111/gtc.12029>, doi: [10.1111/gtc.12029](https://doi.org/10.1111/gtc.12029).
- 656 **Kohwi M**, Doe CQ. Temporal fate specification and neural progenitor competence during development. *Nature*  
657 *Reviews Neuroscience*. 2013; 14(12):823–838. <http://dx.doi.org/10.1038/nrn3618>, doi: 10.1038/nrn3618.
- 658 **Larderet I**, Fritsch PM, Gendre N, Neagu-Maier GL, Fetter RD, Schneider-Mizell CM, Truman JW, Zlatić M,  
659 Cardona A, Sprecher SG. Organization of the *Drosophila* larval visual circuit. *eLife*. 2017 aug; 6:e28387.  
660 <https://doi.org/10.7554/eLife.28387>, doi: [10.7554/eLife.28387](https://doi.org/10.7554/eLife.28387).
- 661 **Larsen C**, Shy D, Spindler S, Fung S, Pereaun W, Younossi-Hartenstein A, Hartenstein V. Patterns of growth, axonal  
662 extension and axonal arborization of neuronal lineages in the developing *Drosophila* brain. *Developmental*  
663 *biology*. 2009 07; 335:289–304.
- 664 **Lee EY**, Hu N, Yuan SS, Cox LA, Bradley A, Lee WH, Herrup K. Dual roles of the retinoblastoma protein in  
665 cell cycle regulation and neuron differentiation. *Genes and Development*. 1994; 8(17):2008–2021. doi:  
666 [10.1101/gad.8.17.2008](https://doi.org/10.1101/gad.8.17.2008).
- 667 **Lee T**, Marticke S, Sung C, Robinow S, Luo L. Cell-Autonomous Requirement of the USP/EcR-B Ecdysone  
668 Receptor for Mushroom Body Neuronal Remodeling in *Drosophila*. *Neuron*. 2000; 28(3):807 – 818. [http://www.](http://www.sciencedirect.com/science/article/pii/S0896627300001550)  
669 [sciencedirect.com/science/article/pii/S0896627300001550](http://www.sciencedirect.com/science/article/pii/S0896627300001550), doi: [https://doi.org/10.1016/S0896-6273\(00\)00155-](https://doi.org/10.1016/S0896-6273(00)00155-0)  
670 [0](https://doi.org/10.1016/S0896-6273(00)00155-0).



- 671 **Lovick JK**, Hartenstein V. Hydroxyurea-mediated neuroblast ablation establishes birth dates of secondary  
672 lineages and addresses neuronal interactions in the developing *Drosophila* brain. *Developmental Bi-*  
673 *ology*. 2015; 402(1):32 – 47. <http://www.sciencedirect.com/science/article/pii/S0012160615001128>, doi:  
674 <https://doi.org/10.1016/j.ydbio.2015.03.005>.
- 675 **Lovick JK**, Kong A, Omoto JJ, Ngo KT, Younossi-Hartenstein A, Hartenstein V. Patterns of growth and tract  
676 formation during the early development of secondary lineages in the *Drosophila* larval brain. *Developmen-*  
677 *tal Neurobiology*. 2015; 76(4):434–451. <https://onlinelibrary.wiley.com/doi/abs/10.1002/dneu.22325>, doi:  
678 [10.1002/dneu.22325](https://doi.org/10.1002/dneu.22325).
- 679 **Lovick JK**, Omoto JJ, Ngo KT, Hartenstein V. Development of the anterior visual input pathway to the *Drosophila*  
680 central complex. *Journal of Comparative Neurology*. 2017; 525(16):3458–3475. <https://onlinelibrary.wiley.com/doi/abs/10.1002/cne.24277>, doi: [10.1002/cne.24277](https://doi.org/10.1002/cne.24277).
- 682 **Martin JR**, Raabe T, Heisenberg M. Central complex substructures are required for the maintenance of locomotor  
683 activity in *Drosophila melanogaster*. *Journal of Comparative Physiology A*. 1999; 185:277–288.
- 684 **Meier T**, Therianos S, Zacharias D, Reichert H. Developmental expression of TERM-1 glycoprotein on growth  
685 cones and terminal arbors of individual identified neurons in the grasshopper. *Journal of Neuroscience*. 1993;  
686 13(4):1498–1510. <http://www.jneurosci.org/content/13/4/1498>.
- 687 **Nern A**, Pfeiffer BD, Rubin GM. Optimized tools for multicolor stochastic labeling reveal diverse stereotyped cell  
688 arrangements in the fly visual system. *Proceedings of the National Academy of Sciences*. 2015; 112(22):E2967–  
689 E2976. <http://www.pnas.org/content/112/22/E2967>, doi: [10.1073/pnas.1506763112](https://doi.org/10.1073/pnas.1506763112).
- 690 **Neuser K**, Triphan T, Mronz M, Poeck B, Strauss R. Analysis of a spatial orientation memory in *Drosophila*.  
691 *Nature*. 2000; 453:1244–1247. <http://dx.doi.org/10.1038/nature07003>, doi: [10.1038/nature07003](https://doi.org/10.1038/nature07003).
- 692 **Ngwenya LB**, Peters A, Rosene DL. Maturation sequence of newly generated neurons in the dentate gyrus  
693 of the young adult rhesus monkey. *Journal of Comparative Neurology*. 2006; 498(2):204–216. <https://onlinelibrary.wiley.com/doi/abs/10.1002/cne.21045>, doi: [10.1002/cne.21045](https://doi.org/10.1002/cne.21045).
- 695 **Ngwenya LB**, Rosene DL, Peters A. An ultrastructural characterization of the newly generated cells in the adult  
696 monkey dentate gyrus. *Hippocampus*. 2008; 18(2):210–220. <https://onlinelibrary.wiley.com/doi/abs/10.1002/hipo.20384>, doi: [10.1002/hipo.20384](https://doi.org/10.1002/hipo.20384).
- 698 **Ohyama T**, Schneider-Mizell CM, Fetter RD, Aleman JV, Franconville R, Rivera-Alba M, Mensh BD, Branson KM,  
699 Simpson JH, Truman JW, Cardona A, Zlatic M. A multilevel multimodal circuit enhances action selection in  
700 *Drosophila*. *Nature*. 2015; 520(7549):633–639. doi: [10.1038/nature14297](https://doi.org/10.1038/nature14297).
- 701 **Omoto JJ**, Keleş MF, Nguyen BM, Bolanos C, Lovick JK, Frye MA, Hartenstein V. Visual Input to the *Drosophila*  
702 Central Complex by Developmentally and Functionally Distinct Neuronal Populations. *Current Biology*. 2017;  
703 27(8):1098–1110. <https://doi.org/10.1016/j.cub.2017.02.063>, doi: [10.1016/j.cub.2017.02.063](https://doi.org/10.1016/j.cub.2017.02.063).
- 704 **Martinez de Paz A**, Ausio J. 17. In: Delgado-Morales R, editor. *MeCP2, A Modulator of Neuronal Chromatin*  
705 *Organization Involved in Rett Syndrome* Cham: Springer International Publishing; 2017. p. 3–21. [https://doi.org/10.1007/978-3-319-53889-1\\_1](https://doi.org/10.1007/978-3-319-53889-1_1), doi: [10.1007/978-3-319-53889-1\\_1](https://doi.org/10.1007/978-3-319-53889-1_1).
- 707 **Pereanu W**, Hartenstein V. Neural Lineages of the *Drosophila* Brain: A Three-Dimensional Digital Atlas of  
708 the Pattern of Lineage Location and Projection at the Late Larval Stage. *Journal of Neuroscience*. 2006;  
709 26(20):5534–5553. <http://www.jneurosci.org/content/26/20/5534>, doi: [10.1523/JNEUROSCI.4708-05.2006](https://doi.org/10.1523/JNEUROSCI.4708-05.2006).
- 710 **Pereanu W**, Kumar A, Jennett A, Reichert H, Hartenstein V. Development-based compartmentalization of the  
711 *Drosophila* central brain. *Journal of Comparative Neurology*. 2010; 518(15):2996–3023. <https://onlinelibrary.wiley.com/doi/abs/10.1002/cne.22376>, doi: [10.1002/cne.22376](https://doi.org/10.1002/cne.22376).
- 713 **Pfeiffer BD**, Ngo TTB, Hibbard KL, Murphy C, Jenett A, Truman JW, Rubin GM. Refinement of Tools for Targeted  
714 Gene Expression in *Drosophila*. *Genetics*. 2010; 186(2):735–755. <http://www.genetics.org/content/186/2/735>,  
715 doi: [10.1534/genetics.110.119917](https://doi.org/10.1534/genetics.110.119917).
- 716 **Pfeiffer K**, Homberg U. Organization and Functional Roles of the Central Complex in the Insect Brain. *Annual*  
717 *Review of Entomology*. 2014; 59(1):165–184. <https://doi.org/10.1146/annurev-ento-011613-162031>, doi:  
718 [10.1146/annurev-ento-011613-162031](https://doi.org/10.1146/annurev-ento-011613-162031), PMID: 24160424.
- 719 **Riebli N**, Viktorin G, Reichert H. Early-born neurons in type II neuroblast lineages establish a larval primordium  
720 and integrate into adult circuitry during central complex development in *Drosophila*. *Neural Development*.  
721 2013 Apr; 8(1):6. <https://doi.org/10.1186/1749-8104-8-6>, doi: [10.1186/1749-8104-8-6](https://doi.org/10.1186/1749-8104-8-6).

- 722 **Saalfeld S**, Cardona A, Hartenstein V, Tomančák P. CATMAID: collaborative annotation toolkit for massive  
723 amounts of image data. *Bioinformatics*. 2009; 25(15):1984–1986. [+http://dx.doi.org/10.1093/bioinformatics/  
724 btp266](http://dx.doi.org/10.1093/bioinformatics/btp266), doi: 10.1093/bioinformatics/btp266.
- 725 **Schneider-Mizell CM**, Gerhard S, Longair M, Kazimiers T, Li F, Zwart MF, Champion A, Midgley FM, Fetter RD,  
726 Saalfeld S, Cardona A. Quantitative neuroanatomy for connectomics in *Drosophila*. *eLife*. 2016 mar; 5:e12059.  
727 <https://doi.org/10.7554/eLife.12059>, doi: 10.7554/eLife.12059.
- 728 **Schubiger M**, Wade AA, Carney GE, Truman JW, Bender M. *Drosophila* EcR-B ecdysone receptor isoforms  
729 are required for larval molting and for neuron remodeling during metamorphosis. *Development*. 1998;  
730 125(11):2053–2062. <http://dev.biologists.org/content/125/11/2053>.
- 731 **Seelig JD**, Jayaraman V. Feature detection and orientation tuning in the *Drosophila* central complex. *Nature*.  
732 2013; 503(7475):262–266. <http://dx.doi.org/10.1038/nature12601>, doi: 10.1038/nature12601.
- 733 **Seelig JD**, Jayaraman V. Neural dynamics for landmark orientation and angular path integration. *Nature*. 2015;  
734 521:186–191. <http://dx.doi.org/10.1038/nature14446>, doi: 10.1038/nature14446.
- 735 **Seri B**, García-Verdugo JM, Collado-Morente L, McEwen BS, Alvarez-Buylla A. Cell types, lineage, and architecture  
736 of the germinal zone in the adult dentate gyrus. *Journal of Comparative Neurology*. 2004; 478(4):359–378.  
737 <https://onlinelibrary.wiley.com/doi/abs/10.1002/cne.20288>, doi: 10.1002/cne.20288.
- 738 **Shahbazian MD**, Antalffy BA, Armstrong D, Zoghbi HY. Insight into Rett syndrome: MeCP2 levels display tissue-  
739 and cell-specific differences and correlate with neuronal maturation. *Human molecular genetics*. 2002; 11  
740 2:115–24.
- 741 **Simon AF**, Boquet I, Synguelakis M, Pr at T. The *Drosophila* putative kinase Linotte (Derailed) prevents  
742 central brain axons from converging on a newly described interhemispheric ring. *Mechanisms of De-  
743 velopment*. 1998; 76(1):45 – 55. <http://www.sciencedirect.com/science/article/pii/S092547739800104X>, doi:  
744 [https://doi.org/10.1016/S0925-4773\(98\)00104-X](https://doi.org/10.1016/S0925-4773(98)00104-X).
- 745 **Spindler SR**, Hartenstein V. Bazooka mediates secondary axon morphology in *Drosophila* brain lineages. *Neural  
746 Development*. 2011 Apr; 6(1):16. <https://doi.org/10.1186/1749-8104-6-16>, doi: 10.1186/1749-8104-6-16.
- 747 **Spindler SR**, Ortiz I, Fung S, Takashima S, Hartenstein V. *Drosophila* cortex and neuropile glia influence sec-  
748 ondary axon tract growth, pathfinding, and fasciculation in the developing larval brain. *Developmental  
749 Biology*. 2009; 334(2):355 – 368. <http://www.sciencedirect.com/science/article/pii/S0012160609010859>, doi:  
750 <https://doi.org/10.1016/j.ydbio.2009.07.035>.
- 751 **Strausfeld NJ**. The Atlas: Sections through the Brain. *Atlas of an Insect Brain*. 1976; p. 1–214. doi: 10.1007/978-  
752 3-642-66179-2\_7.
- 753 **Suloway C**, Pulokas J, Fellmann D, Cheng A, Guerra F, Quispe J, Stagg S, Potter CS, Carragher B. Automated  
754 molecular microscopy: The new Legimon system. *Journal of Structural Biology*. 2005; 151(1):41 – 60. [http://www.  
755 sciencedirect.com/science/article/pii/S1047847705000729](http://www.sciencedirect.com/science/article/pii/S1047847705000729), doi: <https://doi.org/10.1016/j.jsb.2005.03.010>.
- 756 **Syed MH**, Mark B, Doe CQ. Steroid hormone induction of temporal gene expression in *Drosophila* brain  
757 neuroblasts generates neuronal and glial diversity. *eLife*. 2017 apr; 6:e26287. [https://doi.org/10.7554/eLife.  
758 26287](https://doi.org/10.7554/eLife.26287), doi: 10.7554/eLife.26287.
- 759 **Truman JW**. Metamorphosis of the central nervous system of *Drosophila*. *Journal of Neuro-  
760 biology*. 1990; 21(7):1072–1084. <https://onlinelibrary.wiley.com/doi/abs/10.1002/neu.480210711>, doi:  
761 10.1002/neu.480210711.
- 762 **Turner-Evans D**, Wegener S, Rouault H, Franconville R, Wolff T, Seelig JD, Druckmann S, Jayaraman V. Angular  
763 velocity integration in a fly heading circuit. *eLife*. 2017 may; 6:e23496. <https://doi.org/10.7554/eLife.23496>,  
764 doi: 10.7554/eLife.23496.
- 765 **Urbach R**, Technau GM. Neuroblast formation and patterning during early brain development in  
766 *Drosophila*. *BioEssays*. 2004; 26(7):739–751. <https://onlinelibrary.wiley.com/doi/abs/10.1002/bies.20062>,  
767 doi: 10.1002/bies.20062.
- 768 **Veverlytsa L**, Allan DW. Temporally tuned neuronal differentiation supports the functional remodeling of a  
769 neuronal network in *Drosophila*. *Proceedings of the National Academy of Sciences*. 2012; 109(13):4725–4725.  
770 <http://www.pnas.org/content/109/13/E748/1>.

- 771 **Veverytza L**, Allan DW. Subtype-specific neuronal remodeling during *Drosophila* metamorphosis. *Fly*. 2013;  
772 7(2):78–86. <https://doi.org/10.4161/fly.23969>, doi: 10.4161/fly.23969, PMID: 23579264.
- 773 **Wolff T**, Iyer NA, Rubin GM. Neuroarchitecture and neuroanatomy of the *Drosophila* central complex: A GAL4-  
774 based dissection of protocerebral bridge neurons and circuits. *Journal of Comparative Neurology*. 2014;  
775 523(7):997–1037. <https://onlinelibrary.wiley.com/doi/abs/10.1002/cne.23705>, doi: 10.1002/cne.23705.
- 776 **Wong DC**, Lovick JK, Ngo KT, Borisuthirattana W, Omoto JJ, Hartenstein V. Postembryonic lineages of the  
777 *Drosophila* brain: II. Identification of lineage projection patterns based on MARCM clones. *Developmental*  
778 *Biology*. 2013; 384(2):258 – 289. <http://www.sciencedirect.com/science/article/pii/S0012160613003771>, doi:  
779 <https://doi.org/10.1016/j.ydbio.2013.07.009>.
- 780 **Xie X**, Tabuchi M, Brown MP, Mitchell SP, Wu MN, Kolodkin AL. The laminar organization of the *Drosophila*  
781 ellipsoid body is semaphorin-dependent and prevents the formation of ectopic synaptic connections. *eLife*.  
782 2017 jun; 6:e25328. <https://doi.org/10.7554/eLife.25328>, doi: 10.7554/eLife.25328.
- 783 **Yang JS**, Awasaki T, Yu H, He Y, Ding P, Kao J, Lee T. Diverse neuronal lineages make stereotyped contributions  
784 to the *Drosophila* locomotor control center, the central complex. *Journal of Comparative Neurology*. 2013;  
785 521(12):2645–2662. <https://onlinelibrary.wiley.com/doi/abs/10.1002/cne.23339>, doi: 10.1002/cne.23339.
- 786 **Young JM**, Armstrong JD. Structure of the adult central complex in *Drosophila*: Organization of distinct neuronal  
787 subsets. *Journal of Comparative Neurology*. 2010; 518(9):1500–1524. [https://onlinelibrary.wiley.com/doi/abs/](https://onlinelibrary.wiley.com/doi/abs/10.1002/cne.22284)  
788 [10.1002/cne.22284](https://onlinelibrary.wiley.com/doi/abs/10.1002/cne.22284), doi: 10.1002/cne.22284.
- 789 **Younossi-Hartenstein A**, Salvaterra PM, Hartenstein V. Early development of the *Drosophila* brain: IV. Larval  
790 neuropile compartments defined by glial septa. *Journal of Comparative Neurology*. 2003; 455(4):435–450.  
791 <https://onlinelibrary.wiley.com/doi/abs/10.1002/cne.10483>, doi: 10.1002/cne.10483.
- 792 **Yu HH**, Awasaki T, Schroeder MD, Long F, Yang JS, He Y, Ding P, Kao JC, Wu GY, Peng H, Myers G, Lee T. Clonal  
793 development and organization of the adult *Drosophila* central brain. *Current Biology*. 2013; 23:633–643.  
794 <http://dx.doi.org/10.1016/j.cub.2013.02.057>, doi: 10.1016/j.cub.2013.02.057.
- 795 **Zheng X**, Wang J, Haerry TE, Wu AYH, Martin J, O'Connor MB, Lee CHJ, Lee T. TGF- $\beta$  signaling activates steroid  
796 hormone receptor expression during neuronal remodeling in the *Drosophila* brain. *Cell*. 2003; 112(3):303–315.  
797 doi: [doi:10.1016/S0092-8674\(03\)00072-2](https://doi.org/10.1016/S0092-8674(03)00072-2).
- 798 **Zhou B**, Williams DW, Altman J, Riddiford LM, Truman JW. Temporal patterns of broad isoform expression  
799 during the development of neuronal lineages in *Drosophila*. *Neural Development*. 2009 Nov; 4(1):39. <https://doi.org/10.1186/1749-8104-4-39>, doi: 10.1186/1749-8104-4-39.  
800

801 **Supplementary Figures**  
802 **Supplementary Figure 1**

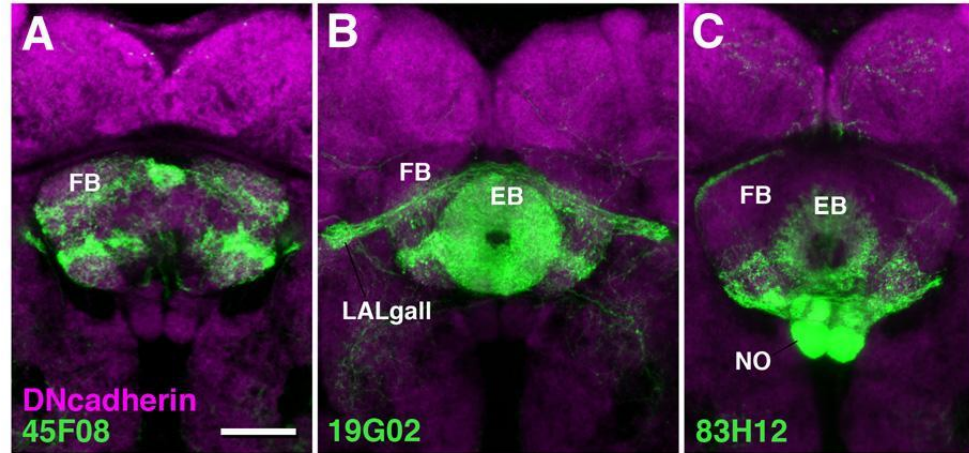

**Fig.S1**

803  
804 Z-projection of frontal confocal sections of median region of adult brain, showing projection of driver lines  
805 R45F08-Gal4 (pontine neurons; A), R19G02-Gal4 (PB-FB-LALgall; PB-EB-LALgall), and R83H12-Gal4 (PB-FB-NO) in  
806 fan-shaped body (FB), ellipsoid body (EB), and noduli (NO). Bar: 20 $\mu$ m

807 **Supplementary Figures S2-S9**

808 Graphic representation of all SU neurons of the first instar (L1) larval brain ordered by lineage groups. SU  
809 neurons of a given lineage are clustered in a cohesive tract, the primary axon tract. These tracts provide useful  
810 landmarks for the ongoing analyses of the L1 brain circuitry using the CATMAID L1 serial TEM dataset, which is  
811 the rationale for preparing this set of supplementary figures.

812 Each of the figures is structured similarly. Panels (A-C) show 3D digital models of L1 brain in dorsal view (A;  
813 anterior to the top), lateral view (B; anterior to the left, dorsal up) and anterior or posterior view (C; dorsal up).  
814 The neuropil surface is rendered in light grey; mushroom body, located in center of brain neuropil, is outlined in  
815 dark grey. In Figures S2-S4 and S7-S9 two additional landmarks, the antennal lobe (antero-ventral brain neuropil)  
816 and larval optic neuropil (postero-lateral brain neuropil), are represented by renderings of individual neurons  
817 [larval optic neuropil: GlulOLP (Larderet et al 2017); antennal lobe: Broad D1 (Berck et al 2017)]. Cell bodies and  
818 axons of all SU neurons of both hemispheres are shown as colored spheres and lines, respectively. Differential  
819 coloring indicates association of SU neurons with discrete lineages, as identified in color key presented in the  
820 table at the bottom right of each figure. Small annotated circles indicate location where corresponding primary  
821 tracts enter the neuropil. Annotations indicate the lineage name. In many cases, only the last part of the lineage  
822 signifier is shown for clarity sake; for example, in Fig.S2, the pair "BALa1/2" is abbreviated as "la1/2". The x,y,z  
823 spatial coordinates of entry points shown in panels A-C are given in table at bottom right of each figure. The  
824 origin (z=0/x=0/y=0) represents the anterior/right/dorsal corner of the virtual cuboid that encloses the data set.  
825 The units for z is section number (z=0 corresponding to most anterior section; section thickness = 60nm); x  
826 and y indicate pixels, with each pixel corresponding to approximately 3.5nm. For each lineage, upper row of  
827 numbers present coordinates of tract entry point in right hemisphere (R); lower row gives coordinates for left  
828 entry point. For nomenclature and grouping of lineages, see Lovick et al. (2013) and Hartenstein et al. (2016).

829 Abbreviations: AL antennal lobe; CX calyx; ML medial lobe; PED peduncle; VL vertical lobe; VNC ventral nerve  
830 cord

831 Supplementary Figure S2

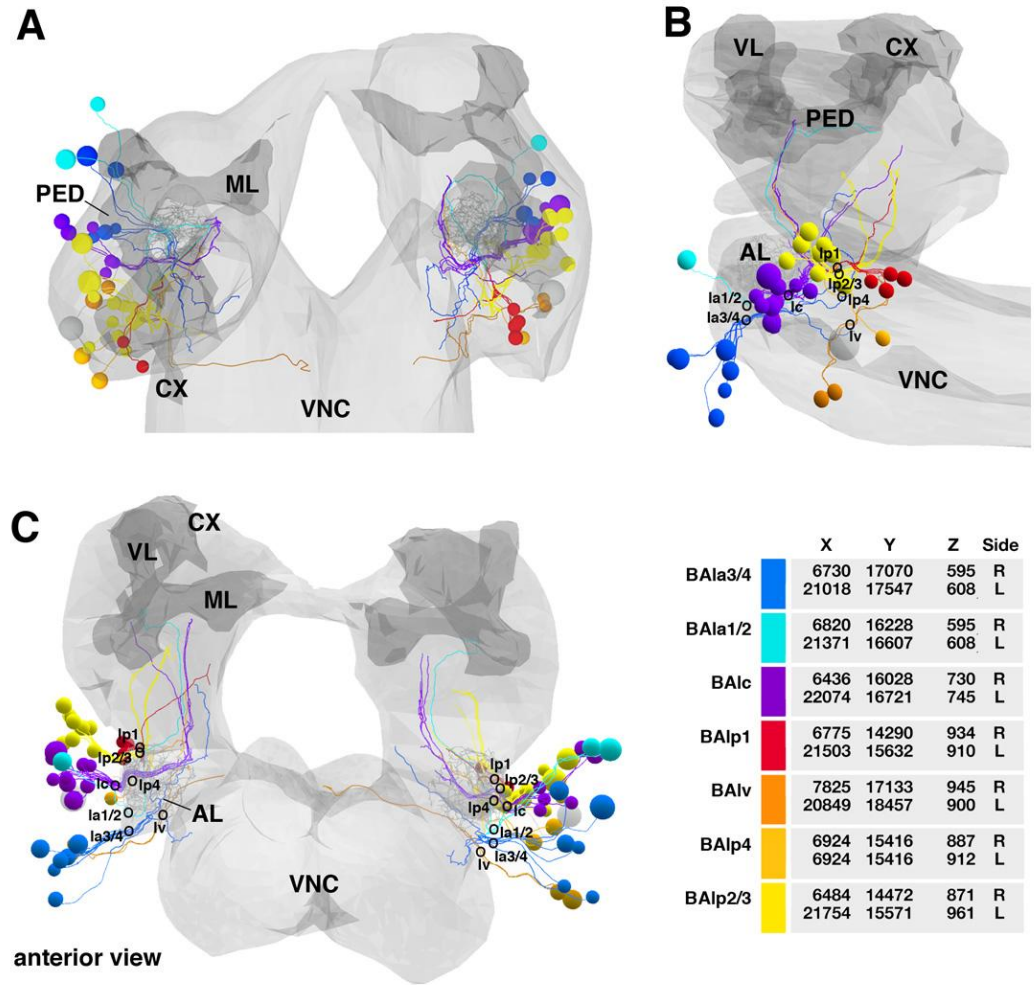

Supplementary Fig.S2

832

833 Lateral baso-anterior group of lineages (BA)

834 Supplementary Figure S3

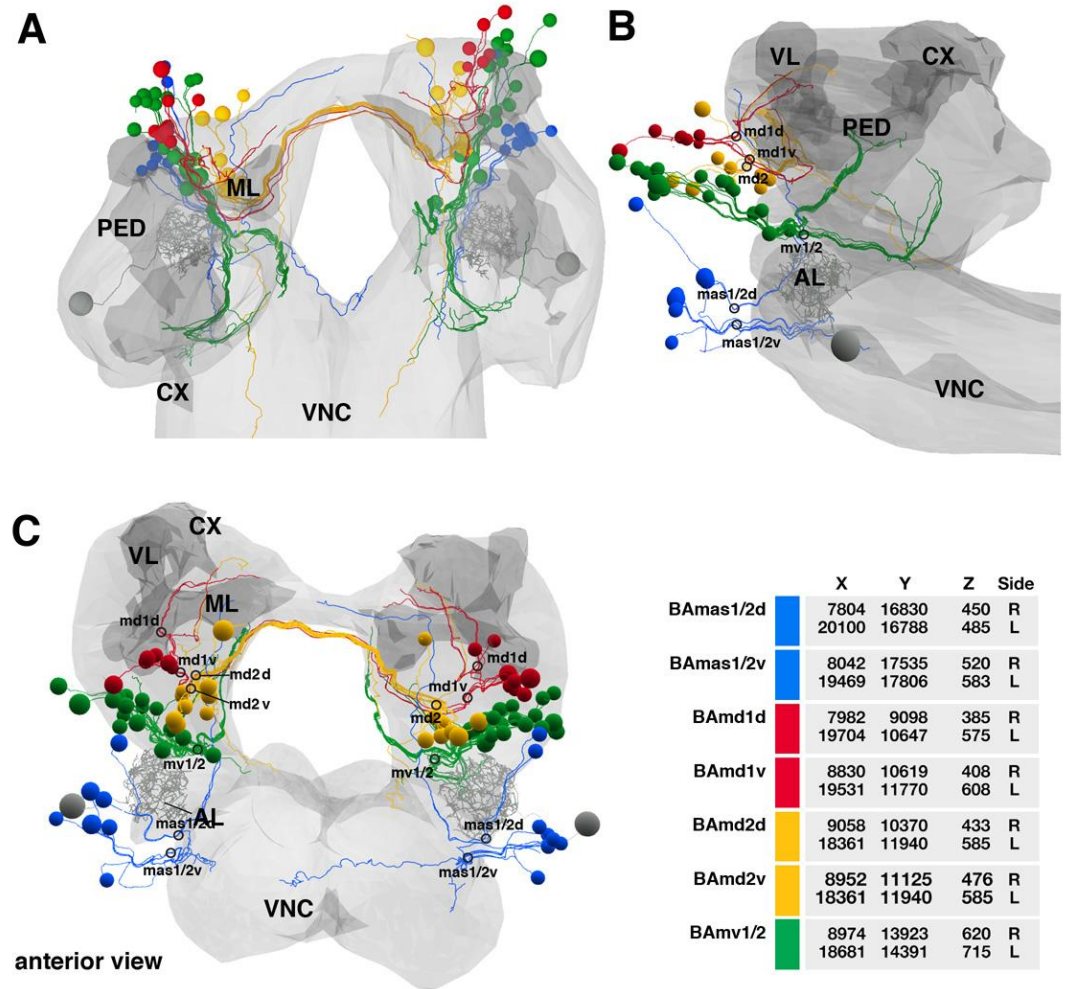

Supplementary Fig.S3

835

836 Medial baso-anterior group of lineages (BA)

837 Supplementary Figure S4

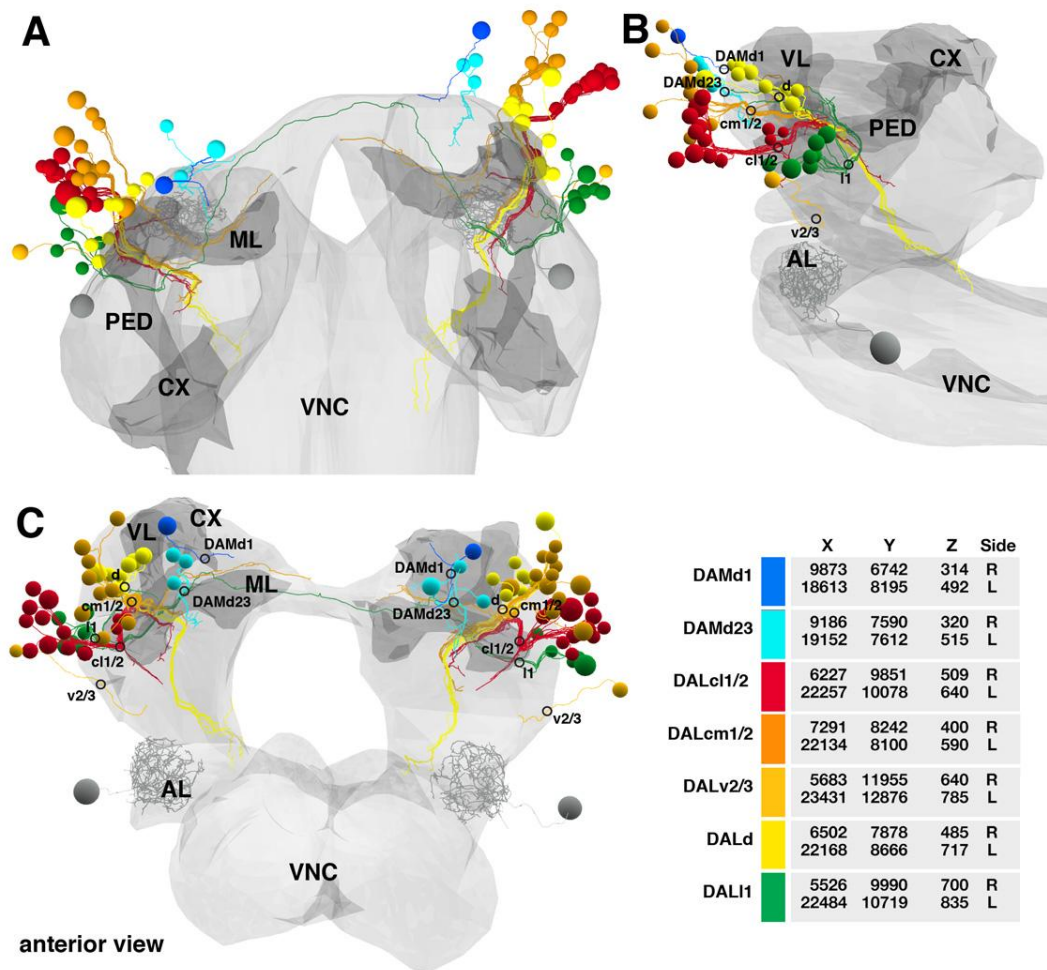

## Supplementary Fig.S4

838

839 Lateral dorso-anterior and medial dorso-anterior groups of lineages (DAL, DAM)

840 Supplementary Figure S5

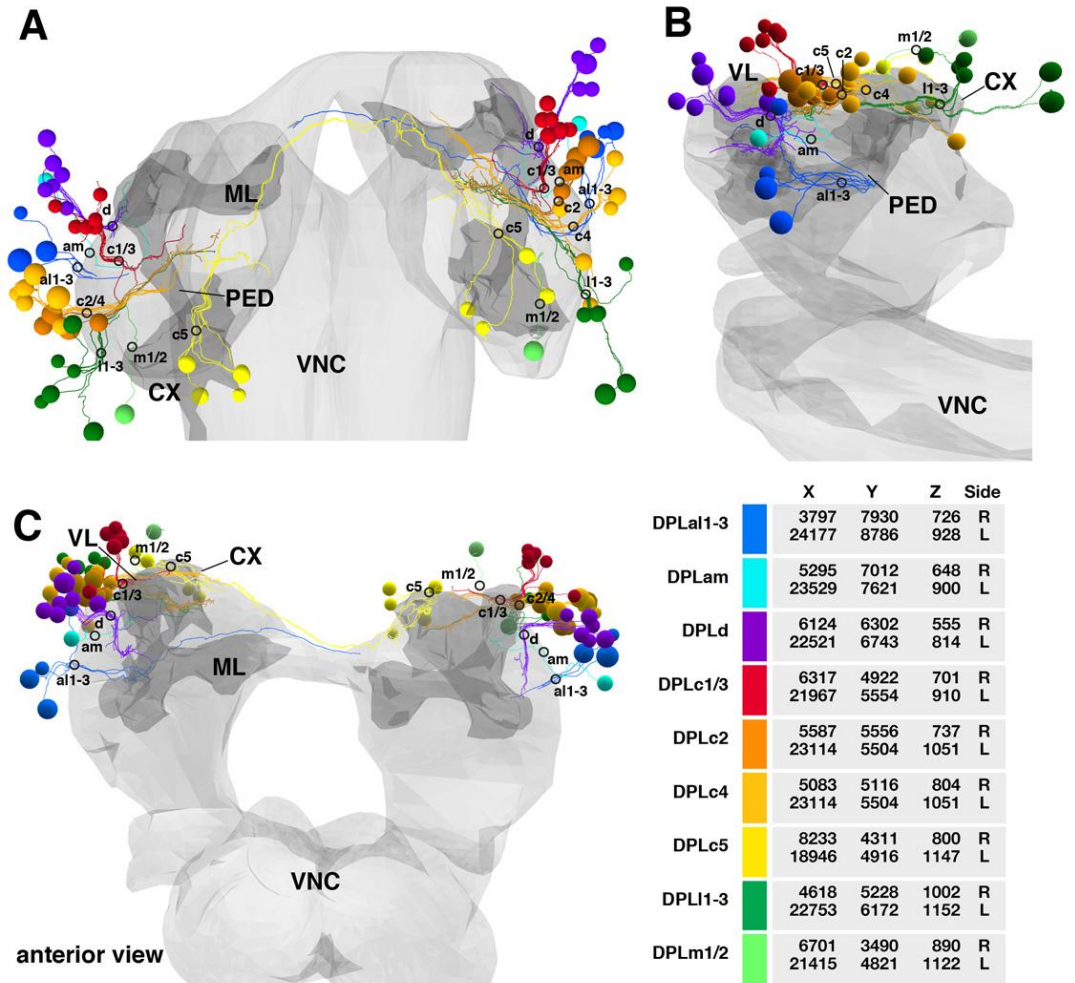

## Supplementary Fig.S5

841

842 Lateral dorso-posterior group of lineages (DPL)



843 Supplementary Figure S6

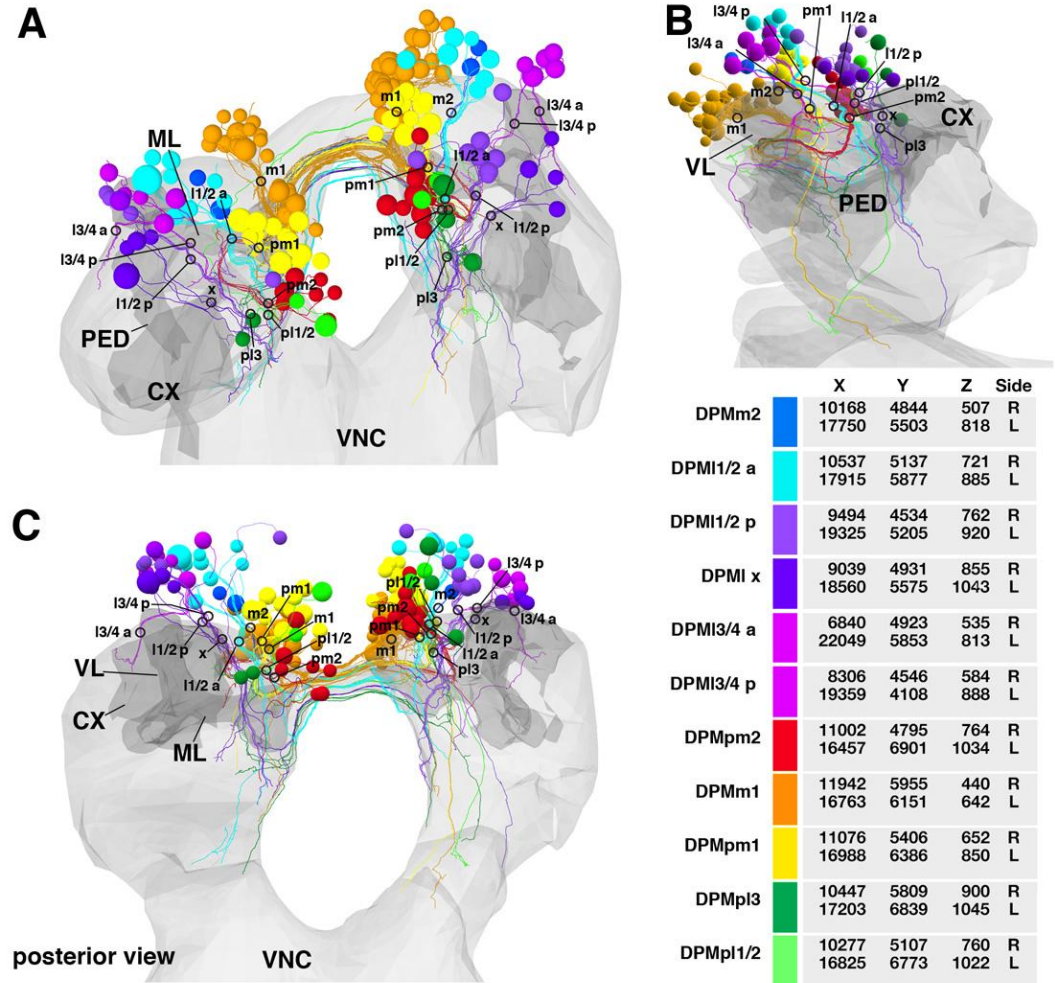

## Supplementary Fig.S6

844

845 Medial dorso-posterior group of lineages (DPM)

846 Supplementary Figure S7

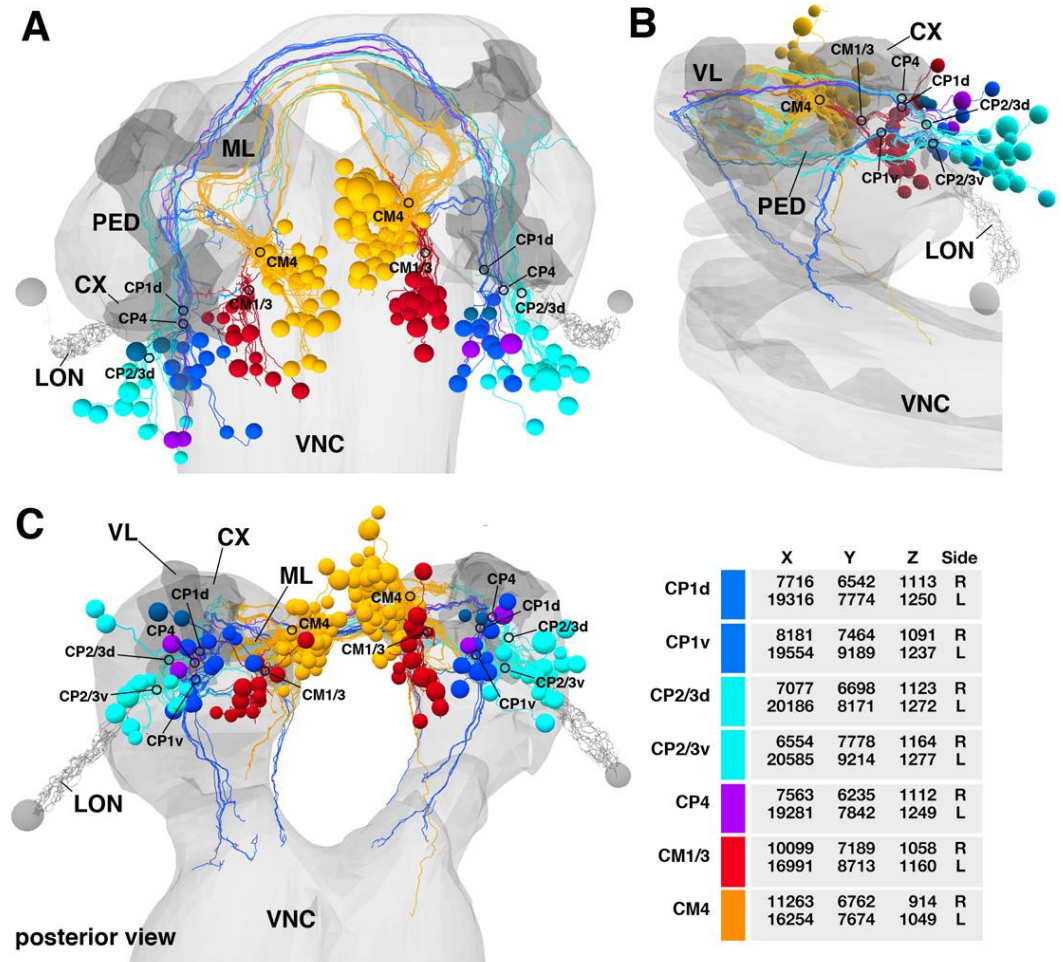

**Supplementary Fig.S7**

847

848 Lateral centro-posterior and medial centro-posterior groups of lineages (CP, CM)

849 Supplementary Figure S8

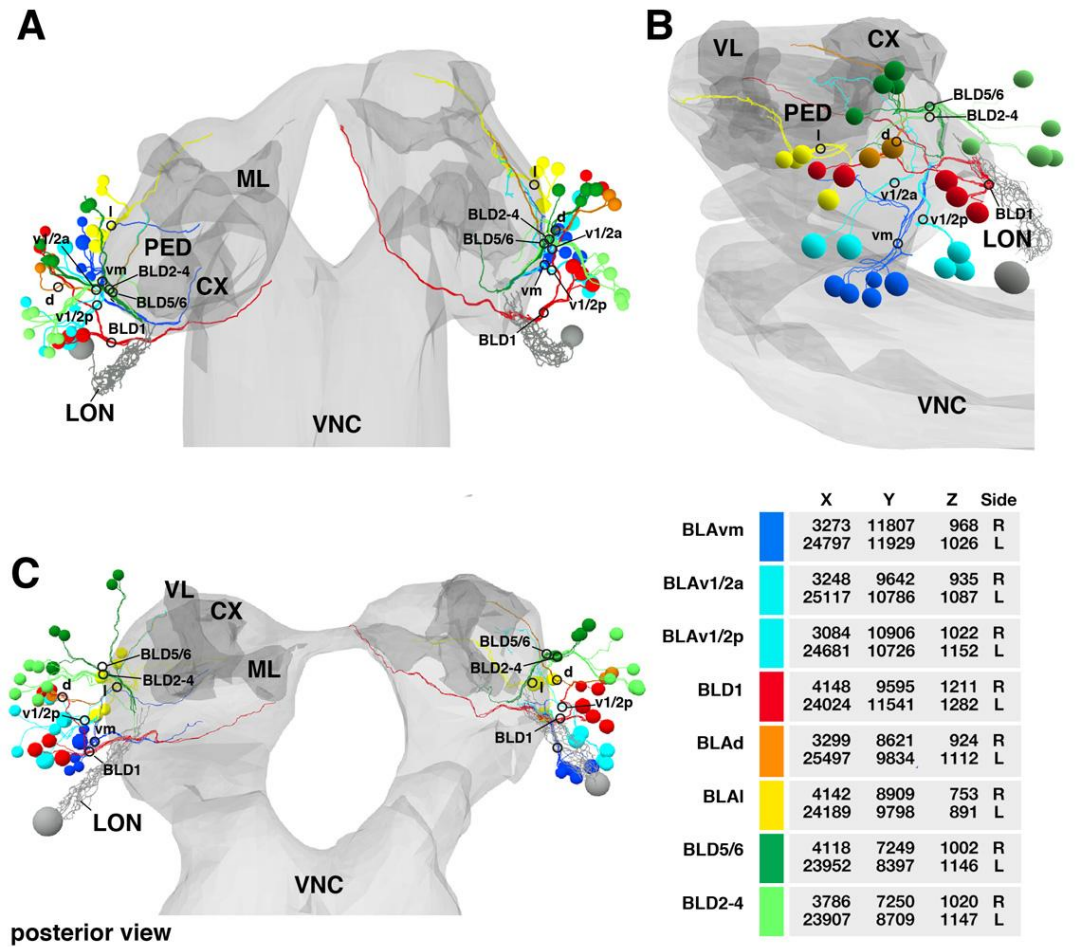

## Supplementary Fig.S8

850

851 Anterior baso-lateral and dorsal baso-lateral groups of lineages (BLA, BLD)

852 Supplementary Figure S9

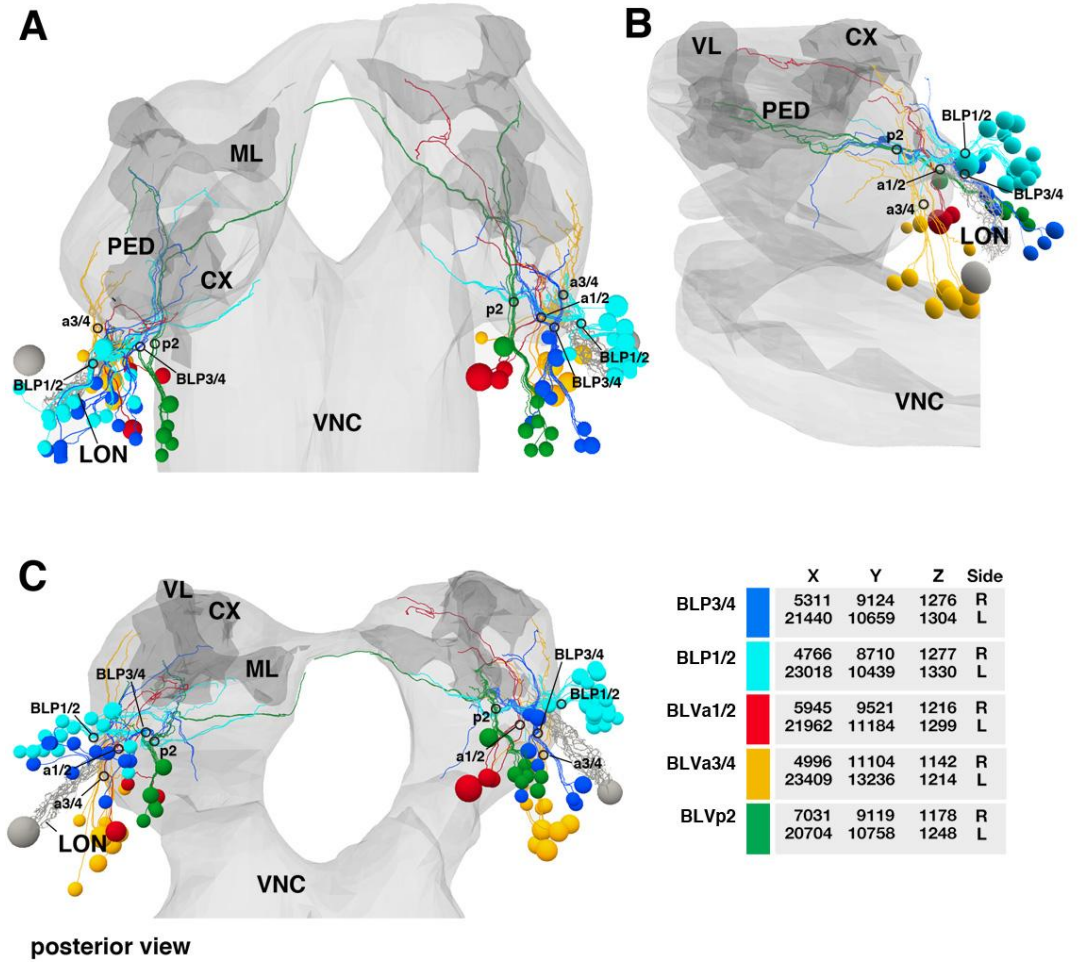

## Supplementary Fig.S9

853

854 Posterior baso-lateral and ventral baso-lateral groups of lineages (BLP, BLV)
